# Supplementary material for: Risk factors for repetitive doctor’s consultations due to cough: a cross-sectional study in a Finnish employed population
Source: PubMed Central journal article supplement — BMJ Open. 2019 Jun 11;9(6):e030945. doi: 10.1136/bmjopen-2019-030945 (PMC6576114; doi:10.1136/bmjopen-2019-030945), 2019-06-11
Supplement: bmjopen-2019-030945.draft_revisions.pdf [file bmjopen-2019-030945.draft_revisions.pdf]

# BMJ Open

BMJ Open is committed to open peer review. As part of this commitment we make the peer review history of every article we publish publicly available.

When an article is published we post the peer reviewers' comments and the authors' responses online. We also post the versions of the paper that were used during peer review. These are the versions that the peer review comments apply to.

The versions of the paper that follow are the versions that were submitted during the peer review process. They are not the versions of record or the final published versions. They should not be cited or distributed as the published version of this manuscript.

BMJ Open is an open access journal and the full, final, typeset and author-corrected version of record of the manuscript is available on our site with no access controls, subscription charges or pay-per-view fees (<http://bmjopen.bmj.com>).

If you have any questions on BMJ Open's open peer review process please email [info.bmjopen@bmj.com](mailto:info.bmjopen@bmj.com)

# BMJ Open

## The risk factors for repetitive doctor's consultations due to cough: A cross-sectional study in a Finnish employed population

|                               |                                                                                                                                                                                                                                                                                                                                                                                                                                                                                                                                                                                                                       |
|-------------------------------|-----------------------------------------------------------------------------------------------------------------------------------------------------------------------------------------------------------------------------------------------------------------------------------------------------------------------------------------------------------------------------------------------------------------------------------------------------------------------------------------------------------------------------------------------------------------------------------------------------------------------|
| Journal:                      | <i>BMJ Open</i>                                                                                                                                                                                                                                                                                                                                                                                                                                                                                                                                                                                                       |
| Manuscript ID                 | bmjopen-2019-030945                                                                                                                                                                                                                                                                                                                                                                                                                                                                                                                                                                                                   |
| Article Type:                 | Research                                                                                                                                                                                                                                                                                                                                                                                                                                                                                                                                                                                                              |
| Date Submitted by the Author: | 08-Apr-2019                                                                                                                                                                                                                                                                                                                                                                                                                                                                                                                                                                                                           |
| Complete List of Authors:     | Koskela, Heikki; Kuopio University Hospital, Unit for Medicine and Clinical Research, Pulmonary Division; University of Eastern Finland, School of Medicine, Institute of Clinical Sciences, Faculty of Health Sciences<br>Lätti, Anne; Kuopio University Hospital, Unit for Medicine and Clinical Research, Pulmonary Division; University of Eastern Finland, School of Medicine, Institute of Clinical Sciences, Faculty of Health Sciences<br>Pekkanen, Juha; Helsingin Yliopisto Laaketieteellinen tiedekunta, Department of Public Health; National Institute for Health and Welfare, Environmental Health Unit |
| Keywords:                     | RESPIRATORY MEDICINE (see Thoracic Medicine), Adult thoracic medicine < THORACIC MEDICINE, Asthma < THORACIC MEDICINE, Epidemiology < THORACIC MEDICINE                                                                                                                                                                                                                                                                                                                                                                                                                                                               |
|                               |                                                                                                                                                                                                                                                                                                                                                                                                                                                                                                                                                                                                                       |

SCHOLARONE™  
Manuscripts

# The risk factors for repetitive doctor's consultations due to cough: A cross-sectional study in a Finnish employed population

Heikki O Koskela, MD <sup>1,2</sup>, Anne M Lätti, MD <sup>1,2</sup>, Juha Pekkanen, MD <sup>3,4</sup>,

<sup>1</sup> Unit for Medicine and Clinical Research, Pulmonary Division, Kuopio University Hospital, Kuopio, Finland

<sup>2</sup> School of Medicine, Institute of Clinical Sciences, Faculty of Health Sciences, University of Eastern Finland, Kuopio, Finland

<sup>3</sup> Department of Public Health, University of Helsinki, Helsinki, Finland.

<sup>4</sup> Environmental Health Unit, National Institute for Health and Welfare, Kuopio, Finland

Corresponding author: Heikki Koskela, Unit for Medicine and Clinical Research, Pulmonary Division, Kuopio University Hospital, Kuopio, Finland. Postal address: PL 100, 70029 KYS, FINLAND, e-mail: heikki.koskela@kuh.fi, telephone: 0447172795

Word count: 2868

**ABSTRACT**

Objectives: Cough is the most common symptom prompting people to consult a doctor, thus representing a huge cost to the health care. This burden could be reduced by decreasing the number of repetitive consultations by the same individuals. Therefore, it would be valuable to recognize the factors that associate with repetitive doctor's consultations due to cough.

Design: A cross-sectional, email survey

Setting: Public service employees in two Finnish towns

Participants: The questionnaire was sent to 13 980 subjects; 3695 (26.4 %) replied.

Interventions: The questionnaire sought detailed information about subject characteristics, all disorders diagnosed by a doctor, various symptoms, and doctor's consultations. Those with current cough were inquired about cough characteristics and filled in the Leicester Cough Questionnaire (LCQ).

Primary outcome: Repetitive ( $\geq 3$ ) doctor's consultations due to cough during the previous 12 months.

Results: There were 205 subjects (5.5 % of the responders) with repetitive consultations. They accounted for 848 out of the 1681 doctor's consultations (50.4 %) due to cough. Among all responders, repetitive consultations were mainly related to the presence of asthma (adjusted odds ratio (aOR) 2.90 (2.01–4.19)) and chronic rhinosinusitis (aOR 2.40 (1.74–3.32)). Among the 975 subjects with current cough, repetitive consultations were mainly related to a low LCQ total score (aOR 3.84 (2.76–5.34) per tertile). Comorbidity, depressive symptoms, and smoking were also associated with repetitive consultations.

Conclusions: A modest proportion of subjects with repetitive consultations is responsible for every second doctor's consultation due to cough. The typical features of these subjects could be identified. These findings can help to focus on certain subpopulations in order to plan interventions to reduce the health care burden attributable to cough.

## STRENGTHS AND LIMITATIONS OF THE STUDY

- The results are based on a large community-based sample of 3695 subjects
- The study included a comprehensive list of possible risk factors for repetitive doctor's consultations due to cough
- All subjects had equal and free-of-charge access to doctors, provided by the participating towns' occupational health care organisations. Therefore, supply-related factors do not interfere with the results.
- Only slightly over one in four (26.4 %) of the original population responded
- As all subjects were public service employees, lower social classes and older individuals are underrepresented.

## A FUNDING STATEMENT

The study was funded by grants from Kuopion Seudun Hengityssäitiö and Hengityssairauksien Tutkimussäätiö Foundations. They had no input in the development of the research or in the preparation of this manuscript.

## A COMPETING INTERESTS STATEMENT

Dr. Koskela reports grants from Kuopion Seudun Hengityssäitiö Foundation, grants from Hengityssairauksien Tutkimussäätiö, during the conduct of the study; personal fees from Mundipharma Ltd, Orion Pharma Ltd, Oy, Eli Lilly Finland Ltd, Boehringer Ingelheim Finland Ltd as payments for giving scientific lectures in gatherings organized by medical companies, personal fees from Takeda Leiras Ltd, Boehringer Ingelheim Ltd, Mundipharma Ltd, and AstraZeneca Ltd, to attend international scientific meetings, in addition to owning shares in Orion Pharma Ltd worth 22 000 euros, outside the submitted work.

Dr. Lätti reports grants from Kuopion Seudun Hengityssäitiö Foundation, grants from Hengityssairauksien Tutkimussäätiö, during the conduct of the study; personal fees from Orion, Boehringer-Ingelheim, Roche to attend international scientific meetings, outside the submitted work.

Dr. Pekkanen has nothing to disclose.

## DATA SHARING STATEMENT

De-identified participant data are available upon request from Heikki Koskela ORCID 0000-0002-3386-3262

## INTRODUCTION

Cough is the most common symptom prompting individuals to seek medical help from a physician and thus it poses a major health care burden.[1, 2] In the United States, every year there are 21 million outpatient consultations due to cough.[2] Surprisingly, very little is known about the factors that prompt a visit to a doctor due to cough. At present, health care seeking behaviour in coughing patients has been mainly investigated in countries in which there is a high prevalence of tuberculosis, with the goal of improving tuberculosis diagnostics.[3-5] In countries with a low tuberculosis prevalence, the aims may be different. In view of the ageing of the populations in the developed world and the limited health care resources, it would be clearly advantageous if we were able to reduce the number of doctor's consultations due to cough. However, seeking medical help due to the appearance of recent-onset cough must not be discouraged because this would compromise early diagnostics of life-threatening lung disorders like lung cancer, tuberculosis and interstitial lung disorders. Thus, a more reasonable goal might be to decrease the number of repetitive consultations due to cough by the same individual. If we wish to plan interventions to achieve this goal, then it is important that the factors that are associated with repetitive consultations should be clarified. In the present study, these factors were defined in a large population of subjects with equal and free-of-charge access to doctors provided by the participants' occupational health care organisations. The present study report is related to two previous publications, which described the risk factors for cough and the consequences of cough in this population.[6, 7]

## METHODS

### Population

This was a cross-sectional e-mail study conducted in all public service employees of two towns in central Finland (altogether 13 980 employees, mean 46.6 years with 79.2 % females). All subjects had free-of-charge access to doctors, provided by the participating towns' occupational health care organisations. An invitation to the study and the questionnaire were sent to the employees' e-mail addresses in March - April 2017. Responses were collected via an electronic questionnaire. One reminder message was sent if a subject had not responded within two weeks. The study was approved by the Ethics Committee of Kuopio University Hospital (289/2015). Permission to conduct the study was obtained from the officials of both towns. The invitation letter to participate included detailed information about the study. A subject's decision to reply was considered as informed consent.

## Questionnaire

The first part of the questionnaire (57 questions) was filled in by all subjects. All disorders diagnosed by a doctor were inquired, as well as a wide variety of symptoms. Asthma-, rhinosinusitis- and reflux-related symptoms were inquired by questions currently recommended for epidemiologic studies.[8-10] Depressive symptoms were inquired by utilising the Patient Health Questionnaire-2 (PHQ-2).[11] The number of doctor's consultations due to cough during the previous 12 months was inquired from all subjects. The second part of the questionnaire consisted of 23 cough-related questions to be answered by those subjects reporting that they had current cough. It included detailed questions about the cough bout frequency and cough duration, as well as the Leicester Cough Questionnaire (LCQ), which measures the cough-related quality of life.[12] The number of doctor's consultations due to cough was inquired. Many questions were adapted from two previous studies, the Health Behaviour and Health among the Finnish Adult Population study [13] and the Finnish National FINRISK study.[14]

## Definitions

The main outcome was repetitive doctor's consultations due to cough. During the last 12 months, 22.5 % of the responders had consulted a doctor due to cough at least once, 11.2 % at least twice, 5.5 % at least three times, 2.7 % at least four times, and 1.4 % at least five times. In the present study, 'repetitive consultations' was arbitrarily defined as at least three doctor's consultations due to cough in the past 12 months.

Current cough was defined as ongoing cough at the time when the survey was conducted. Chronic bronchitis was defined as daily sputum production for at least three months of the year. A cough trigger was defined as the presence of one or more identifiable cough triggers. Current asthma was defined as a doctor's diagnosis of asthma at any age and wheezing during the last 12 months. Chronic rhinosinusitis was present if there was either nasal blockage or nasal discharge (anterior or posterior nasal drip) and either facial pain/pressure or reduction/loss of smell for more than three months.[9] Esophageal reflux disease was present if there had been heartburn and/or regurgitation on at least one day of the week during the last three months.[10] Depressive symptoms were present if the PHQ-2 score was three or more.[11] Allergy was defined as a self-reported allergy to pollens, animals or food. A family history of chronic cough was defined as the presence (now or in the past) of chronic (duration more than eight weeks) cough in parents, sisters or brothers. The disorder sum was defined as the number of medical disorders diagnosed by a doctor. The symptom

1  
2  
3 sum was defined as the sum of symptoms (other than respiratory symptoms) reported by the  
4 subjects.  
5

### 6 7 **Patient involvement**

8  
9  
10 Patients were not directly involved in the design, recruitment, or in the conduct of this study. The  
11 results will be disseminated to study participants through the Kuopio town and Jyväskylä towns'  
12 intranet portals.  
13  
14

### 15 16 **Statistical analysis**

17  
18 The descriptive data is shown as means and 95 % confidence intervals (CI) unless otherwise stated.  
19  
20 In the participants with current cough, the LCQ total scores (ts) were divided into tertiles. First  
21 tertile: 3.0 - 14.1, second tertile: 14.2 to 16.8, and third tertile: 16.9 to 21.0. The cough bout  
22 frequency was also divided into tertiles: First tertile: on 2 – 3 days per week or less often, second  
23 tertile: on 4 – 6 days per week to once daily, and third tertile: several times daily. The cough episode  
24 duration was categorized according to the current guidelines to < 3 weeks (acute cough), 3 – 8 weeks  
25 (subacute cough), and > 8 weeks (chronic cough).[15, 16]  
26  
27  
28  
29

30  
31 The bivariate associations of the following variables with repetitive consultations were analysed:  
32 Current asthma, chronic rhinosinusitis, esophageal reflux disease, depressive symptoms, disorder  
33 sum, symptom sum, acetylsalicylic acid intolerance, allergy, age, gender, body mass index, years of  
34 education, family incomes, professional status, number of family members, pet ownership, moisture  
35 damage exposure, smoking history, weekly alcohol doses, level of daily physical exercise, and family  
36 history of chronic cough. In addition to these factors, the following variables were included in the  
37 analyses among the 975 subjects with current cough: Duration of the current cough episode, current  
38 cough bout frequency, LCQ total score (LCQts), chronic bronchitis, and cough trigger.  
39  
40  
41  
42  
43  
44

45  
46 Mann-Whitney test and chi-square test were applied when appropriate. The variables showing at  
47 least a suggestive ( $p < 0.1$ ) association with repetitive consultations in the bivariate analyses were  
48 included in the multivariate analyses utilising binary logistic regression analysis with backward  
49 directed stepwise process to eliminate non-significant confounders. However, only LCQts was  
50 included without its domains due to the presence of strong interrelationships.  
51  
52  
53

54  
55 A p value less than 0.05 was accepted as the level of statistical significance but in the tables, all  
56 factors with at least a suggestive association ( $p < 0.1$ ) are presented. All analyses were performed  
57 using SPSS version 22 for the personal computer (SPSS, Inc. Chicago, Illinois, USA).  
58  
59

## 60 **RESULTS**



The response rate was 26.4 % (3695 subjects, mean age 47.8 (47.5 – 48.2) years, 82.6 % females, 31.4 % ever-smokers, table 1). The proportion of missing values was less than 1 % in all other questions except for family income (2.5%) and acetylsalicylic acid intolerance (1.4 %).

Table 1. The basic characteristics and their bivariate associations with repetitive ( $\geq 3$  during the last 12 months) doctor's consultations due to cough in the entire population (N = 3695). The figures are percentages or means and 95 % confidence intervals.

| Characteristic                            | Subjects without repetitive doctor's consultations due to cough<br>N = 3490 | Subjects with repetitive doctor's consultations due to cough<br>N = 205 | P value |
|-------------------------------------------|-----------------------------------------------------------------------------|-------------------------------------------------------------------------|---------|
| Female gender, %                          | 82.5                                                                        | 85.3                                                                    | 0.30    |
| Age (years)                               | 47.8 (47.4 – 48.2)                                                          | 48.5 (47.1 – 50.0)                                                      | 0.35    |
| Body mass index (kg/m <sup>2</sup> )      | 26.5 (26.4 – 26.7)                                                          | 27.9 (27.0 – 28.7)                                                      | < 0.001 |
| Family incomes, income class <sup>a</sup> | 1.98 (1.95 – 2.00)                                                          | 2.06 (1.95 – 2.16)                                                      | 0.17    |
| Moisture damage exposure, %               | 25.4                                                                        | 33.7                                                                    | 0.009   |
| Ever smoking, %                           | 31.3                                                                        | 33.2                                                                    | 0.57    |
| Family history of chronic cough, %        | 34.7                                                                        | 51.0                                                                    | < 0.001 |
| Acetylsalicylic acid intolerance, %       | 4.6                                                                         | 9.4                                                                     | 0.002   |
| Allergy, %                                | 17.4                                                                        | 27.8                                                                    | < 0.001 |
| Depressive symptoms, %                    | 4.9                                                                         | 9.4                                                                     | 0.004   |
| Symptom sum                               | 2.55 (2.48 – 2.62)                                                          | 3.56 (3.24 – 3.88)                                                      | < 0.001 |
| Disorder sum                              | 1.08 (1.04 – 1.13)                                                          | 2.31 (2.08 – 2.55)                                                      | < 0.001 |
| Current asthma, %                         | 8.7                                                                         | 36.6                                                                    | < 0.001 |
| Chronic rhinosinusitis, %                 | 14.2                                                                        | 40.5                                                                    | < 0.001 |
| Esophageal reflux disease, %              | 12.1                                                                        | 21.0                                                                    | < 0.001 |

<sup>a</sup> Income classes: 1 = less than 15 000 e/year; 2 = 15 000- 40 000 e; 3 = 40 000 – 70 000 e; 4 = 70 000 – 120 000 e; 5 = over 120 000 e/year. Other definitions, se text.

Among all 3695 responders, there were 205 subjects who reported repetitive doctor's consultations due to cough (5.5 %). They accounted for 848 out of the 1681 doctor's consultations due to cough (50.4 %) during the previous 12 months.

There were 975 participants with current cough (mean age 48.7 (48.0 – 49.3) years, 83.8 % females, 31.4 % ever-smokers). Among them, there were 135 subjects (13.8 % of the subjects with current cough) with repetitive doctor's consultations due to cough. They accounted for 573 out of the 926 doctor's consultations due to cough (61.9 %) among the subjects with a current cough.

In addition to the other baseline characteristics, table 1 shows all variables for which there was at least a suggestive association with repetitive consultations in bivariate analyses among all 3695 responders. Table 2 shows the results of the multivariate analyses in these individuals. The most important factors were the presence of current asthma and chronic rhinosinusitis. Table 3 shows the results of the bivariate analyses among the 975 subjects with current cough and table 4 displays the results of the multivariate analysis in these individuals. Among the subjects with current cough, the LCQts was the most important determinant of repetitive doctor's consultations. The proportions of subjects with repetitive doctor's consultations due to cough within each LCQts tertile are illustrated in figure 1.

Table 2. The characteristics that associated with repetitive doctor's consultations due to cough in the entire population (3695 subjects). Multivariate analysis with adjusted odds ratios (aOR) and confidence intervals (CI).

| Characteristic                   | aOR (95 % CI)      | P value |
|----------------------------------|--------------------|---------|
| Current asthma                   | 2.90 (2.01 – 4.19) | < 0.001 |
| Chronic rhinosinusitis           | 2.40 (1.74 – 3.32) | < 0.001 |
| Disorder sum <sup>a</sup>        | 1.33 (1.20 – 1.47) | < 0.001 |
| Depressive symptoms <sup>b</sup> | 1.72 (1.01 – 2.92) | 0.046   |
| Family history of chronic cough  | 1.38 (1.02 – 1.87) | 0.039   |

<sup>a</sup> aOR calculated for every doctor's diagnosed disorder. <sup>b</sup> Patient Health Questionnaire-2 score three or more

Table 3. The basic characteristics and their bivariate associations with repetitive ( $\geq 3$  during the last 12 months) doctor's consultations due to cough among the subjects with current cough (N = 975). The figures are percentages or means and 95 % confidence intervals unless otherwise stated.

| Characteristic                                                                          | Subjects without repetitive doctor's consultations due to cough. N = 840 | Subjects with repetitive doctor's consultations due to cough. N = 135 | P value |
|-----------------------------------------------------------------------------------------|--------------------------------------------------------------------------|-----------------------------------------------------------------------|---------|
| Female gender, %                                                                        | 83.9                                                                     | 83.6                                                                  | 0.93    |
| Age (years)                                                                             | 48.5 (47.8 – 49.2)                                                       | 49.6 (47.8 – 51.3)                                                    | 0.40    |
| Body mass index (kg/m <sup>2</sup> )                                                    | 27.1 (26.8 – 27.5)                                                       | 27.7 (26.8 – 28.7)                                                    | 0.18    |
| Family incomes, income class <sup>a</sup>                                               | 2.03 (1.98 – 2.08)                                                       | 2.04 (1.90 – 2.17)                                                    | 0.89    |
| Moisture damage exposure, %                                                             | 32.5                                                                     | 38.5                                                                  | 0.17    |
| Ever smoking, %                                                                         | 30.4                                                                     | 37.8                                                                  | 0.085   |
| Family history of chronic cough, %                                                      | 46.3                                                                     | 53.0                                                                  | 0.15    |
| Acetylsalicylic acid intolerance, %                                                     | 5.4                                                                      | 9.8                                                                   | 0.049   |
| Allergy, %                                                                              | 23.8                                                                     | 26.7                                                                  | 0.47    |
| Depressive symptoms, %                                                                  | 5.4                                                                      | 6.7                                                                   | 0.56    |
| Symptom sum                                                                             | 3.18 (3.03 – 3.32)                                                       | 3.69 (3.28 – 4.10)                                                    | 0.017   |
| Disorder sum                                                                            | 1.50 (1.40 – 1.60)                                                       | 2.33 (2.04 – 2.62)                                                    | < 0.001 |
| Chronic bronchitis, %                                                                   | 32.5                                                                     | 56.7                                                                  | < 0.001 |
| Current asthma, %                                                                       | 16.1                                                                     | 40.0                                                                  | < 0.001 |
| Chronic rhinosinusitis, %                                                               | 26.5                                                                     | 45.9                                                                  | < 0.001 |
| Esophageal reflux disease, %                                                            | 16.5                                                                     | 23.0                                                                  | 0.068   |
| Cough trigger, %                                                                        | 73.6                                                                     | 88.9                                                                  | < 0.001 |
| Duration of the cough episode (median, range)                                           | 3 – 8 weeks (some days-over 10 yrs)                                      | 2 – 12 months (some days-over 10 yrs)                                 | < 0.001 |
| Cough bout frequency (median, range)                                                    | Daily (less than weekly – several times a day)                           | Several times a day (less than weekly – several times a day)          | < 0.001 |
| LCQ total score                                                                         | 15.7 (15.5 – 15.9)                                                       | 12.3 (11.8 – 12.8)                                                    | < 0.001 |
| LCQ physical domain                                                                     | 5.06 (5.00 – 5.12)                                                       | 4.08 (3.92 – 4.23)                                                    | < 0.001 |
| LCQ psychological domain                                                                | 5.18 (5.10 – 5.25)                                                       | 3.96 (3.78 – 4.13)                                                    | < 0.001 |
| LCQ social domain                                                                       | 5.45 (5.38 – 5.53)                                                       | 4.25 (4.05 – 4.44)                                                    | < 0.001 |
| Number of doctor's consultations due to cough during the last 12 months (median, range) | 0 (0 – 2)                                                                | 3 (3 – 20)                                                            | < 0.001 |

<sup>a</sup> Income classes: 1 = less than 15 000 e/year; 2 = 15 000- 40 000 e; 3 = 40 000 – 70 000 e; 4 = 70 000 – 120 000 e; 5 = over 120 000 e/year. Other definitions, se text.

Table 4. The characteristics that associated with repetitive doctor's consultations due to cough among 975 subjects with current cough. Multivariate analysis with adjusted odds ratios (aOR) and confidence intervals (CI).

| Characteristic                         | aOR (95 % CI)      | P value |
|----------------------------------------|--------------------|---------|
| LCQ total score <sup>a</sup>           | 3.84 (2.76 – 5.34) | < 0.001 |
| Current asthma                         | 1.85 (1.16 – 2.94) | 0.010   |
| Duration of cough episode <sup>b</sup> | 1.50 (1.17 – 1.93) | 0.001   |
| Smoking ever                           | 1.50 (0.98 – 2.29) | 0.059   |
| Disorder sum <sup>c</sup>              | 1.13 (0.99 – 1.29) | 0.061   |

<sup>a</sup> aOR calculated per one less LCQ total score tertile. <sup>b</sup> aOR calculated per one duration step (< 3 weeks, 3 – 8 weeks, > 8 weeks). <sup>c</sup> aOR calculated for every doctor's diagnosed disorder

The associations of each of the nineteen LCQ questions with repetitive doctor's consultation were analysed and ranked according to the Mann-Whitney test z-score. According to the rank order of association, the LCQ questions with the closest associations were; number 6 (psychological domain: "In the last 2 weeks, my cough has made me feel anxious."), 16 (psychological: "In the last 2 weeks, have you worried that your cough may indicate a serious illness?"), 13 (psychological: "In the last 2 weeks, my cough has made me feel fed up"), 3 (physical: "In the last 2 weeks, have you been tired because of your cough?"), and 17 (psychological: In the last 2 weeks, have you been concerned that other people think something is wrong with you, because of your cough?).

## DISCUSSION

The present study in an employed, working-age population revealed that a modest proportion (5.5 %) of subjects with repetitive doctor's consultations was responsible for about every second consultation to the doctor because of cough. In the entire population, the list of factors underpinning the repetitive consultations resembled that of the common causes of chronic cough[15, 16] i.e. it was predominated by current asthma and chronic rhinosinusitis. The analysis among the 975 subjects with current cough included more detailed information about the characteristics of their cough. In this analysis, the dominant factor behind the repetitive consultations was the severity of the impairment in the cough-related quality of life.

It is well known that a small proportion of individuals account for the majority of health care utilisation and spending. Most of the studies about these "high cost users" have concentrated on the most expensive forms of health care, such as inpatient care, emergency consultations, and

1  
2  
3 operations, and have not been concerned with primary care consultations.[17-20] These “high cost  
4 users” are often found to be elderly, have a low socio-economic status, and suffer from several  
5 comorbid illnesses including mental illnesses or addictions. Accordingly, in the present population, it  
6 was found that the number of comorbid illnesses, the presence of depressive symptoms and  
7 smoking were associated with repetitive consultations. However, age did not show an independent  
8 association. This discrepancy may be attributable to the homogeneous nature of our study  
9 population i.e. all subjects were of working-age. Nonetheless, most of the known characteristics of  
10 “high cost users” could be taken into account in the present analyses.  
11  
12

13  
14  
15  
16  
17 The present population may not represent well the general population since elderly and  
18 unemployed subjects were missing. However, this study has one feature, which makes it especially  
19 enlightening: All subjects had equal and free-of-charge access to doctors, provided by the  
20 participating towns’ occupational health care organisations. Apart from need-related factors, health  
21 care utilisation is also supply-dependent; this is associated with the nature of the health care  
22 system.[21] In the present study, supply-related factors did not influence the results as all the  
23 respondents could obtain medical help from their occupational health care centre.  
24  
25  
26  
27  
28  
29

30  
31 Asthma and chronic rhinosinusitis are important background diseases of chronic cough [15, 16] and  
32 therefore it is not surprising that they were clearly associated with repetitive doctor’s consultations  
33 in the entire population. It may be fair to say that three or more yearly consultations due to cough  
34 by a subject with chronic rhinosinusitis or asthma indicates that there is inadequate control of these  
35 disorders. A better understanding of the association of these disorders with cough as well as their  
36 more efficient management might effectively decrease the number of doctor’s consultations due to  
37 cough. Esophageal reflux disease was not associated with repetitive consultations though it is also  
38 considered as an important background disease to chronic cough.[15, 16] We have previously  
39 reported that for some reason in our study population, esophageal reflux disease is much less clearly  
40 associated with chronic cough than asthma and chronic rhinosinusitis.[6] In the present study, the  
41 diagnoses of chronic rhinosinusitis and esophageal reflux disease relied purely on self-reported  
42 symptoms, a factor which must be borne in mind when considering the associations of these  
43 disorders with repetitive doctor’s consultations.  
44  
45  
46  
47  
48  
49  
50  
51

52  
53 The analysis among subjects with current cough included much more information than the analysis  
54 gathered from the entire population. Therefore, different factors were evident. Among these  
55 subjects, the major factor behind repetitive doctor’s consultations due to cough seems to be the  
56 level of impairment in the cough-related quality of life. Subjects with cough are often dissatisfied  
57 with the therapy prescribed by physicians, which may lead to another consultation as the cough  
58  
59  
60

1  
2  
3 continues.[22] It is noteworthy that the length of the cough episode was also associated with  
4 repetitive doctor's consultations. Therefore, repetitive doctor's consultations due to cough could be  
5 decreased by more effective clinical management of cough on the first consultation which would  
6 make repetitive consultations unnecessary. Further education of general practitioners may be  
7 needed to achieve this goal. However, new, effective medications for the long-standing  
8 hypersensitivity of the cough reflex arch are also urgently needed.[23]  
9

10  
11 The quality of life was measured by the LCQ and the LCQs were divided into tertiles. Given that the  
12 present 975 subjects with current cough represent an unselected, community-based population, we  
13 suggest that the first tertile (3.0 - 14.1) represents severe cough, the second tertile (14.2 – 16.8)  
14 represents individuals with moderate cough and those in the third tertile (16.9 – 21) have mild  
15 cough. The respective proportions of subjects with repetitive doctor's consultations were 31 %, 8 %  
16 and 2 %, highlighting the dominant role of the quality of life impairment. Though LCQ is a well  
17 validated questionnaire,[12] we are unaware of any previous attempts to grade it in a clinically  
18 meaningful way. The grading of LCQs utilized here may have several applications in everyday  
19 clinical cough management as well as in epidemiologic studies. It could also be applied to create  
20 meaningful inclusion criteria for clinical drug trials.  
21

22  
23 LCQ is a very comprehensive questionnaire with nineteen questions covering multiple characteristics  
24 of cough. Interestingly, the most important questions with respect to repetitive consultations  
25 belonged to the psychological domain. It seems that the crucial factor leading to the decision to seek  
26 medical attention is not the symptom per se but the feelings that the symptom induces. This finding  
27 suggests that the patient's concerns may differ significantly from those of the doctor. The latter may  
28 be more interested if there are serious symptoms, like haemoptysis, or if there are symptoms  
29 suggestive of possible background diseases behind the cough, like wheezing or regurgitation.  
30

31  
32 There are several shortcomings in the present study. As mentioned, the population may not  
33 represent well the general population because elderly and unemployed subjects were missing. In  
34 addition, the majority of the participants were female. These facts decrease the applicability of the  
35 data to the general population. The participation rate to the survey was relatively low. However, the  
36 responders and non-responders did not differ with respect to age and sex distribution. Furthermore,  
37 it is unlikely that the low response rate could affect the associations of various features with  
38 repetitive doctor's consultations. The authors did not have access to individual patient files, for  
39 example to investigate physician-patient relationships, the accuracy of diagnoses, or treatment  
40 details. The information gained is based on self-reports in a cross-sectional design with the  
41  
42  
43  
44  
45  
46  
47  
48  
49  
50  
51  
52  
53  
54  
55  
56  
57  
58  
59  
60

1  
2  
3 associated problems of recall bias, biased reporting and the lack of any possibility to separate  
4 associations from causality.  
5

6  
7 In conclusion, a modest proportion of subjects with repetitive doctor's consultations is responsible  
8 for half of all doctor's consultations due to cough. This finding may help to focus on certain  
9 subpopulations in whom interventions to reduce the number of doctor's consultations due to cough  
10 could be targeted, without compromising early diagnostics of life-threatening lung disorders. In the  
11 whole population, repetitive consultations were mainly associated with asthma and chronic  
12 rhinosinusitis. A more widespread understanding about the association of these disorders with  
13 cough and more efficient management of these disorders might effectively reduce the number of  
14 doctor's consultations due to cough. From the patient's point of view, the level of impairment in the  
15 cough-related quality of life and the prolongation of the cough episode increased the probability of  
16 repetitive consultations. Doctor's consultations due to cough could thus also be decreased by more  
17 effective clinical management of cough on the first consultation which would make repetitive  
18 consultations unnecessary. Awareness of the psychological nature of the patient's main concerns  
19 may help physicians to better understand the patient complaining of a cough.  
20  
21  
22  
23  
24  
25  
26  
27  
28  
29  
30  
31  
32  
33  
34  
35  
36  
37  
38  
39  
40  
41  
42  
43  
44  
45  
46  
47  
48  
49  
50  
51  
52  
53  
54  
55  
56  
57  
58  
59  
60

**Acknowledgements:**

We thank Seppo Hartikainen for his assistance in creating the electronic questionnaire and Dr. Ewen MacDonald for the language check.

**Authors' contributions**

Dr Koskela has made substantial contributions to the conception and design of the work, the acquisition, analysis, and interpretation of data for the work, and drafting the work. He has mainly written the manuscript. He has provided the final approval of the version to be published and has consented to be accountable for all aspects of the work in ensuring that questions related to the accuracy or integrity of any part of the work are appropriately investigated and resolved. **He was involved in the analysis and interpretation of the data; in the writing of the report; and in the decision to submit the paper for publication.**

Dr Lätti has made substantial contributions to the conception and design of the work, the acquisition, analysis, and interpretation of data for the work, and drafting the manuscript. She has given her final approval of the version to be published and has provided an agreement to be accountable for all aspects of the work in ensuring that questions related to the accuracy or integrity of any part of the work are appropriately investigated and resolved.

Dr Pekkanen has made substantial contributions to the conception and design of the work, and interpretation of data for the work, and drafting the manuscript. He has provided a final approval of the version to be published and has given his approval to be accountable for all aspects of the work in ensuring that questions related to the accuracy or integrity of any part of the work are appropriately investigated and resolved.



## REFERENCES

- 1 Wandell P, Carlsson AC, Wettermark B, et al. Most common diseases diagnosed in primary care in Stockholm, Sweden, in 2011. *Fam Pract* 2013;30:506-13.
- 2 Centers for disease control and prevention, USA. National Ambulatory Medical Care Survey: 2015 Summary Tables. [https://www.cdc.gov/nchs/ahcd/web\\_tables.htm#2015](https://www.cdc.gov/nchs/ahcd/web_tables.htm#2015). Access date January 2019.
- 3 Hoa NB, Tiemersma EW, Sy DN, et al. Health-seeking behaviour among adults with prolonged cough in Vietnam. *Trop Med Int Health* 2011;16:1260-7.
- 4 Satyanarayana S, Nair SA, Chadha SS, et al. Health-care seeking among people with cough of 2 weeks or more in India. Is passive TB case finding sufficient? *Public Health Action* 2012;2:157-61.
- 5 Senkoro M, Hinderaker SG, Mfinanga SG, et al. Health care-seeking behaviour among people with cough in Tanzania: findings from a tuberculosis prevalence survey. *Int J Tuberc Lung Dis* 2015;19:640-6.
- 6 Lätti AM, Pekkanen J, Koskela HO. Defining the risk factors for acute, subacute and chronic cough: a cross-sectional study in a Finnish adult employee population. *BMJ Open* 2018;8:e022950.
- 7 Koskela HO, Lätti AM, Pekkanen J. The impacts of cough: a cross-sectional study in a Finnish adult employee population. *ERJ Open Res* 2018;4:00113-2018
- 8 Sa-Sousa A, Jacinto T, Azevedo LF, et al. Operational definitions of asthma in recent epidemiological studies are inconsistent. *Clin Transl Allergy* 2014;4:24.
- 9 Fokkens WJ, Lund VJ, Mullol J, et al. European Position Paper on Rhinosinusitis and Nasal Polyps 2012. *Rhinol Suppl* 2012;50:1-298.
- 10 El-Serag HB, Sweet S, Winchester CC, et al. Update on the epidemiology of gastro-oesophageal reflux disease: a systematic review. *Gut* 2014;63:871-80.
- 11 Kroenke K, Spitzer RL, Williams JB. The Patient Health Questionnaire-2: validity of a two-item depression screener. *Med Care* 2003;41:1284-92.
- 12 Birring SS, Prudon B, Carr AJ, et al. Development of a symptom specific health status measure for patients with chronic cough: Leicester Cough Questionnaire (LCQ). *Thorax* 2003;58:339-43.
- 13 National Institute for Health and Welfare. Health Behaviour and Health among the Finnish Adult Population. <https://thl.fi/en/tutkimus-ja-kehittaminen/tutkimukset-ja-hankkeet/aikuisten-terveys-hyvinvointi-ja-palvelututkimus-ath/aiemmat-tutkimukset/suomalaisen-aikuisvaeston-terveyskayttaytyminen-ja-terveys-avtk>. Access date January 2019.
- 14 National Institute for Health and Welfare. The National FINRISK Study. <https://thl.fi/en/web/thlfi-en/research-and-expertwork/population-studies/the-national-finrisk-study>. Access date January 2019.
- 15 Morice AH, McGarvey L, Pavord I, et al. Recommendations for the management of cough in adults. *Thorax* 2006;61 Suppl 1:i24.

1  
2  
3 16 Irwin RS, French CL, Chang AB, et al. Classification of Cough as a Symptom in Adults and  
4 Management Algorithms: CHEST Guideline and Expert Panel Report. *Chest* 2018;153:196-209.

5  
6 17 Rais S, Nazerian A, Ardal S, et al. High-cost users of Ontario's healthcare services. *Healthc Policy*  
7 2013;9:44-51.

8  
9  
10 18 Hutchinson AF, Graco M, Rasekaba TM, et al. Relationship between health-related quality of life,  
11 comorbidities and acute health care utilisation, in adults with chronic conditions. *Health Qual Life*  
12 *Outcomes* 2015;13:69.

13  
14 19 Lee NS, Whitman N, Vakharia N, et al. High-Cost Patients: Hot-Spotters Don't Explain the Half of  
15 It. *J Gen Intern Med* 2017;32:28-34.

16  
17 20 Hensel JM, Taylor VH, Fung K, et al. Unique Characteristics of High-Cost Users of Medical Care  
18 With Comorbid Mental Illness or Addiction in a Population-Based Cohort. *Psychosomatics*  
19 2018;59:135-43.

20  
21 21 Babitsch B, Gohl D, von Lengerke T. Re-reconsultation of Andersen's Behavioral Model of Health  
22 Services Use: a systematic review of studies from 1998-2011. *Psychosoc Med* 2012;9:Doc11.

23  
24 22 Everett CF, Kastelik JA, Thompson RH, et al. Chronic persistent cough in the community: a  
25 questionnaire survey. *Cough* 2007;3:5.

26  
27 23 Abdulqawi R, Dockry R, Holt K, et al. P2X3 receptor antagonist (AF-219) in refractory chronic  
28 cough: a randomised, double-blind, placebo-controlled phase 2 study. *Lancet* 2015;385:1198-205.

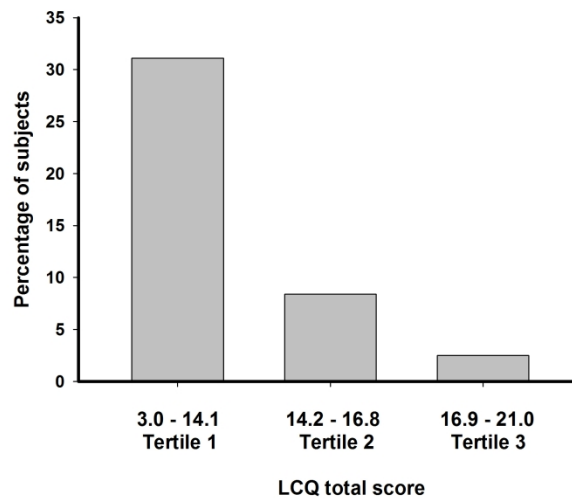

Percentage of subjects with repetitive ( $\geq 3$  during 12 months) doctor's consultations due to cough in each Leicester Cough Questionnaire (LCQ) total score tertile. N = 975, subjects with current cough. Low LCQ total score indicates poor cough-related quality of life.

209x296mm (300 x 300 DPI)

## STROBE Statement—checklist of items that should be included in reports of observational studies

|                           | Item No. | Recommendation                                                                                      | Page No. | Relevant text from manuscript                                                                                                                                                                                                                                                                     |
|---------------------------|----------|-----------------------------------------------------------------------------------------------------|----------|---------------------------------------------------------------------------------------------------------------------------------------------------------------------------------------------------------------------------------------------------------------------------------------------------|
| <b>Title and abstract</b> | 1        | (a) Indicate the study's design with a commonly used term in the title or the abstract              | 1, 2     | Title and abstract, design: A cross-sectional, email survey                                                                                                                                                                                                                                       |
|                           |          | (b) Provide in the abstract an informative and balanced summary of what was done and what was found | 2        | See the abstract                                                                                                                                                                                                                                                                                  |
| <b>Introduction</b>       |          |                                                                                                     |          |                                                                                                                                                                                                                                                                                                   |
| Background/rationale      | 2        | Explain the scientific background and rationale for the investigation being reported                | 4        | Thus, a more reasonable goal might be to decrease the number of repetitive consultations due to cough by the same individual. If we wish to plan interventions to achieve this goal, then it is important that the factors that are associated with repetitive consultations should be clarified. |
| Objectives                | 3        | State specific objectives, including any prespecified hypotheses                                    | 4        | If we wish to plan interventions to achieve this goal, then it is important that the factors that are associated with repetitive consultations should be clarified.                                                                                                                               |
| <b>Methods</b>            |          |                                                                                                     |          |                                                                                                                                                                                                                                                                                                   |
| Study design              | 4        | Present key elements of study design early in the paper                                             | 4        | This was a cross-sectional e-mail study conducted in all public service employees of two towns in central Finland                                                                                                                                                                                 |

|                              |    |                                                                                                                                                                                            |      |                                                                                                                                                                                                                            |
|------------------------------|----|--------------------------------------------------------------------------------------------------------------------------------------------------------------------------------------------|------|----------------------------------------------------------------------------------------------------------------------------------------------------------------------------------------------------------------------------|
| Setting                      | 5  | Describe the setting, locations, and relevant dates, including periods of recruitment, exposure, follow-up, and data collection                                                            | 4    | An invitation to the study and the questionnaire were sent to the employees' e-mail addresses in March - April 2017. Responses were collected via an electronic questionnaire                                              |
| Participants                 | 6  | (a) <i>Cohort study</i> —Give the eligibility criteria, and the sources and methods of selection of participants. Describe methods of follow-up                                            | 4    | This was a cross-sectional e-mail study among all public service employees of two towns in central Finland.                                                                                                                |
|                              |    | <i>Case-control study</i> —Give the eligibility criteria, and the sources and methods of case ascertainment and control selection. Give the rationale for the choice of cases and controls |      |                                                                                                                                                                                                                            |
|                              |    | <i>Cross-sectional study</i> —Give the eligibility criteria, and the sources and methods of selection of participants                                                                      |      |                                                                                                                                                                                                                            |
|                              |    | (b) <i>Cohort study</i> —For matched studies, give matching criteria and number of exposed and unexposed                                                                                   | NA   |                                                                                                                                                                                                                            |
|                              |    | <i>Case-control study</i> —For matched studies, give matching criteria and the number of controls per case                                                                                 |      |                                                                                                                                                                                                                            |
| Variables                    | 7  | Clearly define all outcomes, exposures, predictors, potential confounders, and effect modifiers. Give diagnostic criteria, if applicable                                                   | 5, 6 | The main outcome was repetitive doctor's consultations due to cough. In the present study, 'repetitive consultations' was arbitrarily defined as at least three doctor's consultations due to cough in the past 12 months. |
| Data sources/<br>measurement | 8* | For each variable of interest, give sources of data and details of methods of assessment (measurement). Describe comparability of assessment methods if there is more than one group       | 5    | See the paragraph "Questionnaire".                                                                                                                                                                                         |
| Bias                         | 9  | Describe any efforts to address potential sources of bias                                                                                                                                  | 12   | The participation rate to the survey was relatively low. It is possible that subjects with current cough were more interested to participate than                                                                          |

|            |    |                                           |      |                                                                                                                                                                                                                                                                                                               |
|------------|----|-------------------------------------------|------|---------------------------------------------------------------------------------------------------------------------------------------------------------------------------------------------------------------------------------------------------------------------------------------------------------------|
|            |    |                                           |      | those without. However, the responders and non-responders did not differ with respect to age and sex distribution.                                                                                                                                                                                            |
| Study size | 10 | Explain how the study size was arrived at | 4, 7 | This was a cross-sectional e-mail study among all public service employees of two towns in central Finland (altogether 13 980 employees, mean 46,6 years with 79.2 % females). The response rate was 26.4 % (3695 subjects, mean age 47.8 (47.5 – 48.2) years, 82.6 % females, 31.4 % ever-smokers, table 1). |

Continued on next page

For peer review only

1  
2  
3  
4  
5  
6  
7  
8  
9  
10  
11  
12  
13  
14  
15  
16  
17  
18  
19  
20  
21  
22  
23  
24  
25  
26  
27  
28  
29  
30  
31  
32  
33  
34  
35  
36  
37  
38  
39  
40  
41  
42  
43  
44  
45  
46

|                        |     |                                                                                                                                                                                                                                                                                   |      |                                                                                                                                                                                                                                                                                                                                      |
|------------------------|-----|-----------------------------------------------------------------------------------------------------------------------------------------------------------------------------------------------------------------------------------------------------------------------------------|------|--------------------------------------------------------------------------------------------------------------------------------------------------------------------------------------------------------------------------------------------------------------------------------------------------------------------------------------|
| Quantitative variables | 11  | Explain how quantitative variables were handled in the analyses. If applicable, describe which groupings were chosen and why                                                                                                                                                      | 6    | See the chapter ‘statistical analysis’                                                                                                                                                                                                                                                                                               |
| Statistical methods    | 12  | (a) Describe all statistical methods, including those used to control for confounding                                                                                                                                                                                             | 6    | See the chapter ‘statistical analysis’                                                                                                                                                                                                                                                                                               |
|                        |     | (b) Describe any methods used to examine subgroups and interactions                                                                                                                                                                                                               |      |                                                                                                                                                                                                                                                                                                                                      |
|                        |     | (c) Explain how missing data were addressed                                                                                                                                                                                                                                       | 7    | The proportion of missing values was less than 1 % in all other questions except family income (2.5%) and acetylsalicylic acid intolerance (1.4 %).                                                                                                                                                                                  |
|                        |     | (d) Cohort study—If applicable, explain how loss to follow-up was addressed<br>Case-control study—If applicable, explain how matching of cases and controls was addressed<br>Cross-sectional study—If applicable, describe analytical methods taking account of sampling strategy | 6    | See the chapter ‘statistical analysis’                                                                                                                                                                                                                                                                                               |
|                        |     | (e) Describe any sensitivity analyses                                                                                                                                                                                                                                             | 5, 7 | The main outcome was repetitive doctor’s consultations due to cough. During the last 12 months, 22.5 % of the responders had consulted a doctor due to cough at least once, 11.2 % at least twice, 5.5 % at least three times, 2.7 % at least four times, and 1.4 % at least five times. See also the chapter ‘statistical analysis’ |
| <b>Results</b>         |     |                                                                                                                                                                                                                                                                                   |      |                                                                                                                                                                                                                                                                                                                                      |
| Participants           | 13* | (a) Report numbers of individuals at each stage of study—eg numbers potentially eligible, examined for eligibility, confirmed eligible, included in the study, completing follow-up, and analysed                                                                                 | 4, 7 | This was a cross-sectional e-mail study among all public service employees of two towns in central Finland (altogether 13 980 employees, mean 46,6 years with 79.2 % females).                                                                                                                                                       |

|                  |     |                                                                                                                                                                                                              |                                |                                                                                                                                                                                                                                                                                                          |
|------------------|-----|--------------------------------------------------------------------------------------------------------------------------------------------------------------------------------------------------------------|--------------------------------|----------------------------------------------------------------------------------------------------------------------------------------------------------------------------------------------------------------------------------------------------------------------------------------------------------|
|                  |     |                                                                                                                                                                                                              |                                | The response rate was 26.4 % (3695 subjects, mean age 47.8 (47.5 – 48.2) years, 82.6 % females, 31.4 % ever-smokers, table 1).                                                                                                                                                                           |
|                  |     | (b) Give reasons for non-participation at each stage                                                                                                                                                         | NA                             |                                                                                                                                                                                                                                                                                                          |
|                  |     | (c) Consider use of a flow diagram                                                                                                                                                                           | NA                             |                                                                                                                                                                                                                                                                                                          |
| Descriptive data | 14* | (a) Give characteristics of study participants (eg demographic, clinical, social) and information on exposures and potential confounders                                                                     | Table 1                        | Table 1                                                                                                                                                                                                                                                                                                  |
|                  |     | (b) Indicate number of participants with missing data for each variable of interest                                                                                                                          | 7                              | The proportion of missing values was less than 1 % in all other questions except family income (2.5%) and acetylsalicylic acid intolerance (1.4 %). (2.5%) and acetylsalicylic acid intolerance (1.4 %).                                                                                                 |
|                  |     | (c) <i>Cohort study</i> —Summarise follow-up time (eg, average and total amount)                                                                                                                             | NA                             |                                                                                                                                                                                                                                                                                                          |
| Outcome data     | 15* | <i>Cohort study</i> —Report numbers of outcome events or summary measures over time                                                                                                                          | NA                             |                                                                                                                                                                                                                                                                                                          |
|                  |     | <i>Case-control study</i> —Report numbers in each exposure category, or summary measures of exposure                                                                                                         | NA                             |                                                                                                                                                                                                                                                                                                          |
|                  |     | <i>Cross-sectional study</i> —Report numbers of outcome events or summary measures                                                                                                                           | 7                              | Among the responders, there were 205 subjects (5.5 % of the responders) with repetitive doctor's visits due to cough.                                                                                                                                                                                    |
| Main results     | 16  | (a) Give unadjusted estimates and, if applicable, confounder-adjusted estimates and their precision (eg, 95% confidence interval). Make clear which confounders were adjusted for and why they were included | Tables 1, 2, 3, 4, text page 6 | The variables showing at least a suggestive ( $p < 0.1$ ) association with repetitive consultations in the bivariate analyses were included in the multivariate analyses utilising binary logistic regression analysis with backward directed stepwise process to eliminate non-significant confounders. |



(b) Report category boundaries when continuous variables were categorized

6

The LCQ total scores (ts) were divided into tertiles. First tertile: 3.0 - 14.1, second tertile: 14.2 to 16.8, and third tertile: 16.9 to 21.0. The cough bout frequency was also divided into tertiles: First tertile: on 2 – 3 days per week or less often, second tertile: on 4 – 6 days per week to once daily, and third tertile: several times daily. The cough episode duration was categorized according to the current guidelines to < 3 weeks (acute cough), 3 – 8 weeks (subacute cough), and > 8 weeks (chronic cough).

(c) If relevant, consider translating estimates of relative risk into absolute risk for a meaningful time period

NA

Continued on next page

|                          |    |                                                                                                                                                                            |    |                                                                                                                                                                                                                                                                                                                                                                                                                           |
|--------------------------|----|----------------------------------------------------------------------------------------------------------------------------------------------------------------------------|----|---------------------------------------------------------------------------------------------------------------------------------------------------------------------------------------------------------------------------------------------------------------------------------------------------------------------------------------------------------------------------------------------------------------------------|
| Other analyses           | 17 | Report other analyses done—eg analyses of subgroups and interactions, and sensitivity analyses                                                                             | 6  | There were 975 subjects with current cough                                                                                                                                                                                                                                                                                                                                                                                |
| <b>Discussion</b>        |    |                                                                                                                                                                            |    |                                                                                                                                                                                                                                                                                                                                                                                                                           |
| Key results              | 18 | Summarise key results with reference to study objectives                                                                                                                   | 9  | In the whole population, the list of factors behind repetitive visits resembled that of the common causes of chronic cough, predominated by current asthma and chronic rhinosinusitis. The analysis in the 975 subjects with current cough included more detailed information. Among them, the dominant factor behind repetitive doctor's visits was the severity of the impairment in the cough-related quality of life. |
| Limitations              | 19 | Discuss limitations of the study, taking into account sources of potential bias or imprecision. Discuss both direction and magnitude of any potential bias                 | 11 | There are several shortcomings in the present study...                                                                                                                                                                                                                                                                                                                                                                    |
| Interpretation           | 20 | Give a cautious overall interpretation of results considering objectives, limitations, multiplicity of analyses, results from similar studies, and other relevant evidence | 11 |                                                                                                                                                                                                                                                                                                                                                                                                                           |
| Generalisability         | 21 | Discuss the generalisability (external validity) of the study results                                                                                                      | 9  | The present population may not represent well the general population since elderly and unemployed subjects were missing.                                                                                                                                                                                                                                                                                                  |
| <b>Other information</b> |    |                                                                                                                                                                            |    |                                                                                                                                                                                                                                                                                                                                                                                                                           |
| Funding                  | 22 | Give the source of funding and the role of the funders for the present study and, if applicable, for the original study on which the present article is based              | 3  | The study was funded by grants from Kuopion Hengityssäätö and Hengityssairauksien Tutkimussäätiö foundations.                                                                                                                                                                                                                                                                                                             |

\*Give information separately for cases and controls in case-control studies and, if applicable, for exposed and unexposed groups in cohort and cross-sectional studies.

1  
2  
3  
4  
5  
6  
7  
8  
9  
10  
11  
12  
13  
14  
15  
16  
17  
18  
19  
20  
21  
22  
23  
24  
25  
26  
27  
28  
29  
30  
31  
32  
33  
34  
35  
36  
37  
38  
39  
40  
41  
42  
43  
44  
45  
46

**Note:** An Explanation and Elaboration article discusses each checklist item and gives methodological background and published examples of transparent reporting. The STROBE checklist is best used in conjunction with this article (freely available on the Web sites of PLoS Medicine at <http://www.plosmedicine.org/>, Annals of Internal Medicine at <http://www.annals.org/>, and Epidemiology at <http://www.epidem.com/>). Information on the STROBE Initiative is available at [www.strobe-statement.org](http://www.strobe-statement.org).

For peer review only

# BMJ Open

## The risk factors for repetitive doctor's consultations due to cough: A cross-sectional study in a Finnish employed population

|                                 |                                                                                                                                                                                                                                                                                                                                                                                                                                                                                                                                                                                                                       |
|---------------------------------|-----------------------------------------------------------------------------------------------------------------------------------------------------------------------------------------------------------------------------------------------------------------------------------------------------------------------------------------------------------------------------------------------------------------------------------------------------------------------------------------------------------------------------------------------------------------------------------------------------------------------|
| Journal:                        | <i>BMJ Open</i>                                                                                                                                                                                                                                                                                                                                                                                                                                                                                                                                                                                                       |
| Manuscript ID                   | bmjopen-2019-030945.R1                                                                                                                                                                                                                                                                                                                                                                                                                                                                                                                                                                                                |
| Article Type:                   | Research                                                                                                                                                                                                                                                                                                                                                                                                                                                                                                                                                                                                              |
| Date Submitted by the Author:   | 06-May-2019                                                                                                                                                                                                                                                                                                                                                                                                                                                                                                                                                                                                           |
| Complete List of Authors:       | Koskela, Heikki; Kuopio University Hospital, Unit for Medicine and Clinical Research, Pulmonary Division; University of Eastern Finland, School of Medicine, Institute of Clinical Sciences, Faculty of Health Sciences<br>Lätti, Anne; Kuopio University Hospital, Unit for Medicine and Clinical Research, Pulmonary Division; University of Eastern Finland, School of Medicine, Institute of Clinical Sciences, Faculty of Health Sciences<br>Pekkanen, Juha; Helsingin Yliopisto Laaketieteellinen tiedekunta, Department of Public Health; National Institute for Health and Welfare, Environmental Health Unit |
| <b>Primary Subject Heading</b>: | Health services research                                                                                                                                                                                                                                                                                                                                                                                                                                                                                                                                                                                              |
| Secondary Subject Heading:      | Health services research, Public health, Respiratory medicine                                                                                                                                                                                                                                                                                                                                                                                                                                                                                                                                                         |
| Keywords:                       | RESPIRATORY MEDICINE (see Thoracic Medicine), Adult thoracic medicine < THORACIC MEDICINE, Asthma < THORACIC MEDICINE, Epidemiology < THORACIC MEDICINE                                                                                                                                                                                                                                                                                                                                                                                                                                                               |
|                                 |                                                                                                                                                                                                                                                                                                                                                                                                                                                                                                                                                                                                                       |

SCHOLARONE™  
Manuscripts

## The risk factors for repetitive doctor's consultations due to cough: A cross-sectional study in a Finnish employed population

Heikki O Koskela, MD <sup>1,2</sup>, Anne M Lätti, MD <sup>1,2</sup>, Juha Pekkanen, MD <sup>3,4</sup>,

<sup>1</sup> Unit for Medicine and Clinical Research, Pulmonary Division, Kuopio University Hospital, Kuopio, Finland

<sup>2</sup> School of Medicine, Institute of Clinical Sciences, Faculty of Health Sciences, University of Eastern Finland, Kuopio, Finland

<sup>3</sup> Department of Public Health, University of Helsinki, Helsinki, Finland.

<sup>4</sup> Environmental Health Unit, National Institute for Health and Welfare, Kuopio, Finland

Corresponding author: Heikki Koskela, Unit for Medicine and Clinical Research, Pulmonary Division, Kuopio University Hospital, Kuopio, Finland. Postal address: PL 100, 70029 KYS, FINLAND, e-mail: heikki.koskela@kuh.fi, telephone: 0447172795

Word count: 2775

**ABSTRACT**

Objectives: Cough is the most common symptom prompting people to consult a doctor, thus representing a huge cost to the health care. This burden could be reduced by decreasing the number of repetitive consultations by the same individuals. Therefore, it would be valuable to recognize the factors that associate with repetitive doctor's consultations due to cough.

Design: A cross-sectional, email survey

Setting: Public service employees in two Finnish towns

Participants: The questionnaire was sent to 13 980 subjects; 3695 (26.4 %) participated.

Interventions: The questionnaire sought detailed information about participant characteristics, all disorders diagnosed by a doctor, various symptoms, and doctor's consultations. Those with current cough were inquired about cough characteristics and filled in the Leicester Cough Questionnaire (LCQ).

Primary outcome: Repetitive ( $\geq 3$ ) doctor's consultations due to cough during the previous 12 months.

Results: There were 205 participants (5.5 % of the participants) with repetitive consultations. They accounted for 848 out of the 1681 doctor's consultations (50.4 %) due to cough. Among all participants, repetitive consultations were mainly related to the presence of asthma (adjusted odds ratio (aOR) 2.90 (2.01–4.19)) and chronic rhinosinusitis (aOR 2.40 (1.74–3.32)). Among the 975 participants with current cough, repetitive consultations were mainly related to a low LCQ total score (aOR 3.84 (2.76–5.34) per tertile). Comorbidity, depressive symptoms, and smoking were also associated with repetitive consultations.

Conclusions: A modest proportion of subjects with repetitive consultations is responsible for every second doctor's consultation due to cough. The typical features of these subjects could be identified. These findings can help to focus on certain subpopulations in order to plan interventions to reduce the health care burden attributable to cough.

## STRENGTHS AND LIMITATIONS OF THE STUDY

- The results are based on a large community-based sample of 3695 participants
- The study included a comprehensive list of possible risk factors for repetitive doctor's consultations due to cough
- All participants had equal and free-of-charge access to doctors, provided by the participating towns' occupational health care organisations. Therefore, supply-related factors do not interfere with the results.
- Only slightly over one in four (26.4 %) of the original population participated
- As all participants were public service employees, lower social classes and older individuals are underrepresented.

## A FUNDING STATEMENT

The study was funded by grants from Kuopion Seudun Hengityssäitiö and Hengityssairauksien Tutkimussäätiö Foundations. They had no input in the development of the research or in the preparation of this manuscript.

## A COMPETING INTERESTS STATEMENT

Dr. Koskela reports grants from Kuopion Seudun Hengityssäitiö Foundation, grants from Hengityssairauksien Tutkimussäätiö, during the conduct of the study; personal fees from Mundipharma Ltd, Orion Pharma Ltd, Oy, Eli Lilly Finland Ltd, Boehringer Ingelheim Finland Ltd as payments for giving scientific lectures in gatherings organized by medical companies, personal fees from Takeda Leiras Ltd, Boehringer Ingelheim Ltd, Mundipharma Ltd, and AstraZeneca Ltd, to attend international scientific meetings, in addition to owning shares in Orion Pharma Ltd worth 22 000 euros, outside the submitted work.

Dr. Lätti reports grants from Kuopion Seudun Hengityssäitiö Foundation, grants from Hengityssairauksien Tutkimussäätiö, during the conduct of the study; personal fees from Orion, Boehringer-Ingelheim, Roche to attend international scientific meetings, outside the submitted work.

Dr. Pekkanen has nothing to disclose.

## DATA SHARING STATEMENT

De-identified participant data are available upon request from Heikki Koskela ORCID 0000-0002-3386-3262

## INTRODUCTION

Cough is the most common symptom prompting individuals to seek medical help from a physician and thus it poses a major health care burden.[1, 2] In the United States, every year there are 21 million outpatient consultations due to cough.[2] Surprisingly, very little is known about the factors that prompt a visit to a doctor due to cough. At present, health care seeking behaviour in coughing patients has been mainly investigated in countries in which there is a high prevalence of tuberculosis, with the goal of improving tuberculosis diagnostics.[3-5] In countries with a low tuberculosis prevalence, the aims may be different. In view of the ageing of the populations in the developed world and the limited health care resources, it would be clearly advantageous if we were able to reduce the number of doctor's consultations due to cough. However, seeking medical help due to the appearance of recent-onset cough must not be discouraged because this would compromise early diagnostics of life-threatening lung disorders like lung cancer, tuberculosis and interstitial lung disorders. Thus, a more reasonable goal might be to decrease the number of repetitive consultations due to cough by the same individual. If we wish to plan interventions to achieve this goal, then it is important that the factors that are associated with repetitive consultations should be clarified. The present study was conducted to define the factors associated with repetitive doctor's consultations due to cough in a large population of subjects with equal and free-of-charge access to doctors provided by the participants' occupational health care organisations. The present study report is related to two previous publications, which described the risk factors for cough and the consequences of cough in this population.[6, 7]

## METHODS

### Population

This was a cross-sectional e-mail study conducted in all public service employees of two towns in central Finland (altogether 13 980 employees, mean 46.6 years with 79.2 % females). All participants had free-of-charge access to doctors, provided by the participating towns' occupational health care organisations. An invitation to the study and the questionnaire were sent to the employees' e-mail addresses in March - April 2017. Responses were collected via an electronic questionnaire. One reminder message was sent if a subject had not responded within two weeks. The study was approved by the Ethics Committee of Kuopio University Hospital (289/2015). Permission to conduct the study was obtained from the officials of both towns. The invitation letter to participate included detailed information about the study. A participant's decision to reply was considered as informed consent.



## Questionnaire

The first part of the questionnaire (57 questions) was filled in by all participants. All disorders diagnosed by a doctor were inquired, as well as a wide variety of symptoms. Asthma-, rhinosinusitis- and reflux-related symptoms were inquired by questions currently recommended for epidemiologic studies.[8-10] Depressive symptoms were inquired by utilising the Patient Health Questionnaire-2 (PHQ-2).[11] The number of doctor's consultations due to cough during the previous 12 months was inquired from all participants. The second part of the questionnaire consisted of 23 cough-related questions to be answered by those participants reporting that they had current cough. It included detailed questions about the cough bout frequency and cough duration, as well as the Leicester Cough Questionnaire (LCQ), which measures the cough-related quality of life.[12] Many questions were adapted from two previous studies, the Health Behaviour and Health among the Finnish Adult Population study [13] and the Finnish National FINRISK study.[14]

## Definitions

The main outcome was repetitive doctor's consultations due to cough. During the last 12 months, 22.5 % of the responders had consulted a doctor due to cough at least once, 11.2 % at least twice, 5.5 % at least three times, 2.7 % at least four times, and 1.4 % at least five times. In the present study, 'repetitive consultations' was arbitrarily defined as at least three doctor's consultations due to cough in the past 12 months.

Current cough was defined as ongoing cough at the time when the survey was conducted. Chronic bronchitis was defined as daily sputum production for at least three months of the year. A cough trigger was defined as the presence of one or more identifiable cough triggers. Current asthma was defined as a doctor's diagnosis of asthma at any age and wheezing during the last 12 months. Chronic rhinosinusitis was present if there was either nasal blockage or nasal discharge (anterior or posterior nasal drip) and either facial pain/pressure or reduction/loss of smell for more than three months.[9] Esophageal reflux disease was present if there had been heartburn and/or regurgitation on at least one day of the week during the last three months.[10] Depressive symptoms were present if the PHQ-2 score was three or more.[11] Allergy was defined as a self-reported allergy to pollens, animals or food. A family history of chronic cough was defined as the presence (now or in the past) of chronic (duration more than eight weeks) cough in parents, sisters or brothers. The disorder sum was defined as the number of medical disorders diagnosed by a doctor. The symptom sum was defined as the sum of symptoms (other than respiratory symptoms) reported by the participants.

### Patient involvement

Patients were not directly involved in the design, recruitment, or in the conduct of this study. The results will be disseminated to study participants through the Kuopio town and Jyväskylä towns' intranet portals.

### Statistical analysis

The descriptive data is shown as means and 95 % confidence intervals (CI) unless otherwise stated. In the participants with current cough, the LCQ total scores (ts) were divided into tertiles. First tertile: 3.0 - 14.1, second tertile: 14.2 to 16.8, and third tertile: 16.9 to 21.0. The cough bout frequency was also divided into tertiles: First tertile: on 2 – 3 days per week or less often, second tertile: on 4 – 6 days per week to once daily, and third tertile: several times daily. The cough episode duration was categorized according to the current guidelines to < 3 weeks (acute cough), 3 – 8 weeks (subacute cough), and > 8 weeks (chronic cough).[15, 16]

The bivariate associations of the following variables with repetitive consultations were analysed: Current asthma, chronic rhinosinusitis, esophageal reflux disease, depressive symptoms, disorder sum, symptom sum, acetylsalicylic acid intolerance, allergy, age, gender, body mass index, years of education, family incomes, professional status, number of family members, pet ownership, moisture damage exposure, smoking history, weekly alcohol doses, level of daily physical exercise, and family history of chronic cough. In addition to these factors, the following variables were included in the analyses among the 975 participants with current cough: Duration of the current cough episode, current cough bout frequency, LCQ total score (LCQts), chronic bronchitis, and cough trigger.

Mann-Whitney test and chi-square test were applied when appropriate. The variables showing at least a suggestive ( $p < 0.1$ ) association with repetitive consultations in the bivariate analyses were included in the multivariate analyses utilising binary logistic regression analysis with backward directed stepwise process to eliminate non-significant confounders. However, only LCQts was included without its domains due to the presence of strong interrelationships.

A p value less than 0.05 was accepted as the level of statistical significance but in the tables, all factors with at least a suggestive association ( $p < 0.1$ ) are presented. All analyses were performed using SPSS version 22 for the personal computer (SPSS, Inc. Chicago, Illinois, USA).

## RESULTS

The response rate was 26.4 % (3695 participants, mean age 47.8 (47.5 – 48.2) years, 82.6 % females, 31.4 % ever-smokers, table 1). The proportion of missing values was less than 1 % in all other questions except for family income (2.5%) and acetylsalicylic acid intolerance (1.4 %).

Table 1. The basic characteristics and their bivariate associations with repetitive ( $\geq 3$  during the last 12 months) doctor's consultations due to cough in all participants (N = 3695). The figures are percentages or means and 95 % confidence intervals.

| Characteristic                            | Participants without repetitive doctor's consultations due to cough<br>N = 3490 | Participants with repetitive doctor's consultations due to cough<br>N = 205 | P value |
|-------------------------------------------|---------------------------------------------------------------------------------|-----------------------------------------------------------------------------|---------|
| Female gender, %                          | 82.5                                                                            | 85.3                                                                        | 0.30    |
| Age (years)                               | 47.8 (47.4 – 48.2)                                                              | 48.5 (47.1 – 50.0)                                                          | 0.35    |
| Body mass index (kg/m <sup>2</sup> )      | 26.5 (26.4 – 26.7)                                                              | 27.9 (27.0 – 28.7)                                                          | < 0.001 |
| Family incomes, income class <sup>a</sup> | 1.98 (1.95 – 2.00)                                                              | 2.06 (1.95 – 2.16)                                                          | 0.17    |
| Moisture damage exposure, %               | 25.4                                                                            | 33.7                                                                        | 0.009   |
| Ever smoking, %                           | 31.3                                                                            | 33.2                                                                        | 0.57    |
| Family history of chronic cough, %        | 34.7                                                                            | 51.0                                                                        | < 0.001 |
| Acetylsalicylic acid intolerance, %       | 4.6                                                                             | 9.4                                                                         | 0.002   |
| Allergy, %                                | 17.4                                                                            | 27.8                                                                        | < 0.001 |
| Depressive symptoms, %                    | 4.9                                                                             | 9.4                                                                         | 0.004   |
| Symptom sum                               | 2.55 (2.48 – 2.62)                                                              | 3.56 (3.24 – 3.88)                                                          | < 0.001 |
| Disorder sum                              | 1.08 (1.04 – 1.13)                                                              | 2.31 (2.08 – 2.55)                                                          | < 0.001 |
| Current asthma, %                         | 8.7                                                                             | 36.6                                                                        | < 0.001 |
| Chronic rhinosinusitis, %                 | 14.2                                                                            | 40.5                                                                        | < 0.001 |
| Esophageal reflux disease, %              | 12.1                                                                            | 21.0                                                                        | < 0.001 |

<sup>a</sup> Income classes: 1 = less than 15 000 e/year; 2 = 15 000- 40 000 e; 3 = 40 000 – 70 000 e; 4 = 70 000 – 120 000 e; 5 = over 120 000 e/year. Other definitions, se text.

Among all 3695 responders, there were 205 participants who reported repetitive doctor's consultations due to cough (5.5 %). They accounted for 848 out of the 1681 doctor's consultations due to cough (50.4 %) during the previous 12 months.

There were 975 participants with current cough (mean age 48.7 (48.0 – 49.3) years, 83.8 % females, 31.4 % ever-smokers). Among them, there were 135 participants (13.8 % of the participants with current cough) with repetitive doctor's consultations due to cough. They accounted for 573 out of the 926 doctor's consultations due to cough (61.9 %) among the participants with a current cough.

In addition to the other baseline characteristics, table 1 shows all variables for which there was at least a suggestive association with repetitive consultations in bivariate analyses among all 3695 responders. Table 2 shows the results of the multivariate analyses in these individuals. The most important factors were the presence of current asthma and chronic rhinosinusitis. Table 3 shows the results of the bivariate analyses among the 975 participants with current cough and table 4 displays the results of the multivariate analysis in these individuals. Among the participants with current cough, the LCQts was the most important determinant of repetitive doctor's consultations. The proportions of participants with repetitive doctor's consultations due to cough within each LCQts tertile are illustrated in figure 1.

Table 2. The characteristics that associated with repetitive ( $\geq 3$  during the last 12 months) doctor's consultations due to cough in all participants (3695 subjects). Multivariate analysis with adjusted odds ratios (aOR) and confidence intervals (CI).

| Characteristic                   | aOR (95 % CI)      | P value |
|----------------------------------|--------------------|---------|
| Current asthma                   | 2.90 (2.01 – 4.19) | < 0.001 |
| Chronic rhinosinusitis           | 2.40 (1.74 – 3.32) | < 0.001 |
| Disorder sum <sup>a</sup>        | 1.33 (1.20 – 1.47) | < 0.001 |
| Depressive symptoms <sup>b</sup> | 1.72 (1.01 – 2.92) | 0.046   |
| Family history of chronic cough  | 1.38 (1.02 – 1.87) | 0.039   |

<sup>a</sup> aOR calculated for every doctor's diagnosed disorder. <sup>b</sup> Patient Health Questionnaire-2 score three or more

Table 3. The basic characteristics and their bivariate associations with repetitive ( $\geq 3$  during the last 12 months) doctor's consultations due to cough among the participants with current cough (N = 975). The figures are percentages or means and 95 % confidence intervals unless otherwise stated.

| Characteristic                                                                          | Participants without repetitive doctor's consultations due to cough. N = 840 | Participants with repetitive doctor's consultations due to cough. N = 135 | P value |
|-----------------------------------------------------------------------------------------|------------------------------------------------------------------------------|---------------------------------------------------------------------------|---------|
| Female gender, %                                                                        | 83.9                                                                         | 83.6                                                                      | 0.93    |
| Age (years)                                                                             | 48.5 (47.8 – 49.2)                                                           | 49.6 (47.8 – 51.3)                                                        | 0.40    |
| Body mass index (kg/m <sup>2</sup> )                                                    | 27.1 (26.8 – 27.5)                                                           | 27.7 (26.8 – 28.7)                                                        | 0.18    |
| Family incomes, income class <sup>a</sup>                                               | 2.03 (1.98 – 2.08)                                                           | 2.04 (1.90 – 2.17)                                                        | 0.89    |
| Moisture damage exposure, %                                                             | 32.5                                                                         | 38.5                                                                      | 0.17    |
| Ever smoking, %                                                                         | 30.4                                                                         | 37.8                                                                      | 0.085   |
| Family history of chronic cough, %                                                      | 46.3                                                                         | 53.0                                                                      | 0.15    |
| Acetylsalicylic acid intolerance, %                                                     | 5.4                                                                          | 9.8                                                                       | 0.049   |
| Allergy, %                                                                              | 23.8                                                                         | 26.7                                                                      | 0.47    |
| Depressive symptoms, %                                                                  | 5.4                                                                          | 6.7                                                                       | 0.56    |
| Symptom sum                                                                             | 3.18 (3.03 – 3.32)                                                           | 3.69 (3.28 – 4.10)                                                        | 0.017   |
| Disorder sum                                                                            | 1.50 (1.40 – 1.60)                                                           | 2.33 (2.04 – 2.62)                                                        | < 0.001 |
| Chronic bronchitis, %                                                                   | 32.5                                                                         | 56.7                                                                      | < 0.001 |
| Current asthma, %                                                                       | 16.1                                                                         | 40.0                                                                      | < 0.001 |
| Chronic rhinosinusitis, %                                                               | 26.5                                                                         | 45.9                                                                      | < 0.001 |
| Esophageal reflux disease, %                                                            | 16.5                                                                         | 23.0                                                                      | 0.068   |
| Cough trigger, %                                                                        | 73.6                                                                         | 88.9                                                                      | < 0.001 |
| Duration of the cough episode (median, range)                                           | 3 – 8 weeks<br>(some days-over 10 yrs)                                       | 2 – 12 months<br>(some days-over 10 yrs)                                  | < 0.001 |
| Cough bout frequency (median, range)                                                    | Daily<br>(less than weekly – several times a day)                            | Several times a day<br>(less than weekly – several times a day)           | < 0.001 |
| LCQ total score                                                                         | 15.7 (15.5 – 15.9)                                                           | 12.3 (11.8 – 12.8)                                                        | < 0.001 |
| LCQ physical domain                                                                     | 5.06 (5.00 – 5.12)                                                           | 4.08 (3.92 – 4.23)                                                        | < 0.001 |
| LCQ psychological domain                                                                | 5.18 (5.10 – 5.25)                                                           | 3.96 (3.78 – 4.13)                                                        | < 0.001 |
| LCQ social domain                                                                       | 5.45 (5.38 – 5.53)                                                           | 4.25 (4.05 – 4.44)                                                        | < 0.001 |
| Number of doctor's consultations due to cough during the last 12 months (median, range) | 0 (0 – 2)                                                                    | 3 (3 – 20)                                                                | < 0.001 |

<sup>a</sup> Income classes: 1 = less than 15 000 e/year; 2 = 15 000- 40 000 e; 3 = 40 000 – 70 000 e; 4 = 70 000 – 120 000 e; 5 = over 120 000 e/year. Other definitions, se text.

Table 4. The characteristics that associated with repetitive ( $\geq 3$  during the last 12 months) doctor's consultations due to cough among 975 participants with current cough. Multivariate analysis with adjusted odds ratios (aOR) and confidence intervals (CI).

| Characteristic                         | aOR (95 % CI)      | P value |
|----------------------------------------|--------------------|---------|
| LCQ total score <sup>a</sup>           | 3.84 (2.76 – 5.34) | < 0.001 |
| Current asthma                         | 1.85 (1.16 – 2.94) | 0.010   |
| Duration of cough episode <sup>b</sup> | 1.50 (1.17 – 1.93) | 0.001   |
| Smoking ever                           | 1.50 (0.98 – 2.29) | 0.059   |
| Disorder sum <sup>c</sup>              | 1.13 (0.99 – 1.29) | 0.061   |

<sup>a</sup> aOR calculated per one less LCQ total score tertile. <sup>b</sup> aOR calculated per one duration step (< 3 weeks, 3 – 8 weeks, > 8 weeks). <sup>c</sup> aOR calculated for every doctor's diagnosed disorder

The associations of each of the nineteen LCQ questions with repetitive doctor's consultations were analysed and ranked according to the Mann-Whitney test z-score. The five questions with the closest associations are presented in table 5. Most of these belonged to the psychological domain of the LCQ.

Table 5. The five Leicester cough questionnaire (LCQ) questions, which showed the closest associations with repetitive ( $\geq 3$  during the last 12 months) doctor's consultations among participants with current cough (N = 975), according to the Mann-Whitney test z score. The question with the strongest association is uppermost. Domain indicates the LCQ domain (psy = psychological, phy = physical, soc = social). The scale in each question is 1 – 7 with a lower value indicating more severe impairment. The figures are means and 95 % confidence intervals.  $p < 0.001$  between the subgroups in all presented questions.

| Question                                                                                                                 | LCQ question number, domain | Participants without repetitive doctor's consultations due to cough. N = 840 | Participants with repetitive doctor's consultations due to cough. N = 135 | Z score |
|--------------------------------------------------------------------------------------------------------------------------|-----------------------------|------------------------------------------------------------------------------|---------------------------------------------------------------------------|---------|
| In the last 2 weeks, my cough has made me feel anxious.                                                                  | LCQ 6, psy                  | 5.37 (5.28 – 5.46)                                                           | 3.83 (3.60 – 4.06)                                                        | -11.2   |
| In the last 2 weeks, have you worried that your cough may indicate a serious illness?                                    | LCQ 16, psy                 | 5.70 (5.61 – 5.79)                                                           | 4.34 (4.10 – 4.57)                                                        | -10.3   |
| In the last 2 weeks, my cough has made me feel fed up.                                                                   | LCQ 13, psy                 | 4.49 (4.37 – 4.61)                                                           | 2.88 (2.62 – 3.14)                                                        | -9.5    |
| In the last 2 weeks, have you been tired because of your cough?                                                          | LCQ 3, phy                  | 5.29 (5.19 – 5.39)                                                           | 3.99 (3.76 – 4.23)                                                        | -9.3    |
| In the last 2 weeks, have you been concerned that other people think something is wrong with you, because of your cough? | LCQ 17, psy                 | 5.91 (5.83 – 6.00)                                                           | 4.70 (4.45 – 4.96)                                                        | -9.2    |

## DISCUSSION

The present study in an employed, working-age population revealed that a modest proportion (5.5 %) of participants with repetitive doctor's consultations was responsible for about every second consultation to the doctor because of cough. In the entire population, the list of factors underpinning the repetitive consultations resembled that of the common causes of chronic cough[15, 16] i.e. it was predominated by current asthma and chronic rhinosinusitis. The analysis

1  
2  
3 among the 975 participants with current cough included more detailed information about the  
4 characteristics of their cough. In this analysis, the dominant factor behind the repetitive  
5 consultations was the severity of the impairment in the cough-related quality of life.  
6  
7

8  
9 It is well known that a small proportion of individuals account for the majority of health care  
10 utilisation and spending. Most of the studies about these “high cost users” have concentrated on the  
11 most expensive forms of health care, such as inpatient care, emergency consultations, and  
12 operations, and have not been concerned with primary care consultations.[17-20] These “high cost  
13 users” are often found to be elderly, have a low socio-economic status, and suffer from several  
14 comorbid illnesses including mental illnesses or addictions. Accordingly, in the present population, it  
15 was found that the number of comorbid illnesses, the presence of depressive symptoms and  
16 smoking were associated with repetitive consultations. However, age did not show an independent  
17 association. This discrepancy may be attributable to the homogeneous nature of our study  
18 population i.e. all participants were of working-age. Nonetheless, most of the known characteristics  
19 of “high cost users” could be taken into account in the present analyses.  
20  
21  
22  
23  
24  
25  
26  
27

28 The present population may not represent well the general population since elderly and  
29 unemployed subjects were missing. However, this study has one feature, which makes it especially  
30 enlightening: All participants had equal and free-of-charge access to doctors, provided by the  
31 participating towns’ occupational health care organisations. Apart from need-related factors, health  
32 care utilisation is also supply-dependent; this is associated with the nature of the health care  
33 system.[21] In the present study, supply-related factors did not influence the results as all the  
34 respondents could obtain medical help from their occupational health care centre.  
35  
36  
37  
38  
39  
40

41 Asthma and chronic rhinosinusitis are important background diseases of chronic cough [15, 16] and  
42 therefore it is not surprising that they were clearly associated with repetitive doctor’s consultations  
43 in the entire population. It may be fair to say that three or more yearly consultations due to cough  
44 by a patient with chronic rhinosinusitis or asthma indicates that there is inadequate control of these  
45 disorders. A better understanding of the association of these disorders with cough as well as their  
46 more efficient management might effectively decrease the number of doctor’s consultations due to  
47 cough. Esophageal reflux disease was not associated with repetitive consultations though it is also  
48 considered as an important background disease to chronic cough.[15, 16] We have previously  
49 reported that for some reason in our study population, esophageal reflux disease is much less clearly  
50 associated with chronic cough than asthma and chronic rhinosinusitis.[6] In the present study, the  
51 diagnoses of chronic rhinosinusitis and esophageal reflux disease relied purely on self-reported  
52  
53  
54  
55  
56  
57  
58  
59  
60



1  
2  
3 symptoms, a factor which must be borne in mind when considering the associations of these  
4 disorders with repetitive doctor's consultations.  
5

6  
7 The analysis among participants with current cough included much more information than the  
8 analysis gathered from the entire population. Therefore, different factors were evident. Among  
9 these participants, the major factor behind repetitive doctor's consultations due to cough seems to  
10 be the level of impairment in the cough-related quality of life. Patients with cough are often  
11 dissatisfied with the therapy prescribed by physicians, which may lead to another consultation as the  
12 cough continues.[22] It is noteworthy that the length of the cough episode was also associated with  
13 repetitive doctor's consultations. Therefore, repetitive doctor's consultations due to cough could be  
14 decreased by more effective clinical management of cough on the first consultation which would  
15 make repetitive consultations unnecessary. Further education of general practitioners may be  
16 needed to achieve this goal. However, new, effective medications for the long-standing  
17 hypersensitivity of the cough reflex arch are also urgently needed.[23]  
18  
19  
20  
21  
22  
23  
24  
25

26 The quality of life was measured by the LCQ and the LCQts were divided into tertiles. Given that the  
27 present 975 participants with current cough represent an unselected, community-based population,  
28 we suggest that the first tertile (3.0 - 14.1) represents severe cough, the second tertile (14.2 – 16.8)  
29 represents individuals with moderate cough and those in the third tertile (16.9 – 21) have mild  
30 cough. The respective proportions of participants with repetitive doctor's consultations were 31 %, 8  
31 % and 2 %, highlighting the dominant role of the quality of life impairment. Though LCQ is a well  
32 validated questionnaire,[12] we are unaware of any previous attempts to grade it in a clinically  
33 meaningful way. The grading of LCQts utilized here may have several applications in everyday  
34 clinical cough management as well as in epidemiologic studies. It could also be applied to create  
35 meaningful inclusion criteria for clinical drug trials.  
36  
37  
38  
39  
40  
41  
42  
43

44 LCQ is a very comprehensive questionnaire with nineteen questions covering multiple characteristics  
45 of cough. Interestingly, the most important questions with respect to repetitive consultations  
46 belonged to the psychological domain. It seems that the crucial factor leading to the decision to seek  
47 medical attention is not the symptom per se but the feelings that the symptom induces. This finding  
48 suggests that the patient's concerns may differ significantly from those of the doctor. The latter may  
49 be more interested if there are serious symptoms, like haemoptysis, or if there are symptoms  
50 suggestive of possible background diseases behind the cough, like wheezing or regurgitation.  
51  
52  
53  
54  
55

56 There are several shortcomings in the present study. As mentioned, the population may not  
57 represent well the general population because elderly and unemployed subjects were missing. In  
58  
59  
60

1  
2  
3 addition, the majority of the participants were female. These facts decrease the applicability of the  
4 data to the general population. The participation rate to the survey was relatively low. However, the  
5 responders and non-responders did not differ with respect to age and sex distribution. Furthermore,  
6 it is unlikely that the low response rate could affect the associations of various features with  
7 repetitive doctor's consultations. The authors did not have access to individual patient files, for  
8 example to investigate physician-patient relationships, the accuracy of diagnoses, or treatment  
9 details. The information gained is based on self-reports in a cross-sectional design with the  
10 associated problems of recall bias, biased reporting and the lack of any possibility to separate  
11 associations from causality.  
12  
13  
14  
15  
16  
17

18  
19 In conclusion, a modest proportion of subjects with repetitive doctor's consultations is responsible  
20 for half of all doctor's consultations due to cough. This finding may help to focus on certain  
21 subpopulations in whom interventions to reduce the number of doctor's consultations due to cough  
22 could be targeted, without compromising early diagnostics of life-threatening lung disorders. In the  
23 whole population, repetitive consultations were mainly associated with asthma and chronic  
24 rhinosinusitis. A more widespread understanding about the association of these disorders with  
25 cough and more efficient management of these disorders might effectively reduce the number of  
26 doctor's consultations due to cough. From the patient's point of view, the level of impairment in the  
27 cough-related quality of life and the prolongation of the cough episode increased the probability of  
28 repetitive consultations. Doctor's consultations due to cough could thus also be decreased by more  
29 effective clinical management of cough on the first consultation which would make repetitive  
30 consultations unnecessary. Awareness of the psychological nature of the patient's main concerns  
31 may help physicians to better understand the patient complaining of a cough.  
32  
33  
34  
35  
36  
37  
38  
39  
40  
41  
42  
43  
44  
45  
46  
47  
48  
49  
50  
51  
52  
53  
54  
55  
56  
57  
58  
59  
60

**Acknowledgements:**

We thank Seppo Hartikainen for his assistance in creating the electronic questionnaire and Dr. Ewen MacDonald for the language check.

**Authors' contributions**

Dr Koskela has made substantial contributions to the conception and design of the work, the acquisition, analysis, and interpretation of data for the work, and drafting the work. He has mainly written the manuscript. He has provided the final approval of the version to be published and has consented to be accountable for all aspects of the work in ensuring that questions related to the accuracy or integrity of any part of the work are appropriately investigated and resolved. He was involved in the analysis and interpretation of the data; in the writing of the report; and in the decision to submit the paper for publication.

Dr Lätti has made substantial contributions to the conception and design of the work, the acquisition, analysis, and interpretation of data for the work, and drafting the manuscript. She has given her final approval of the version to be published and has provided an agreement to be accountable for all aspects of the work in ensuring that questions related to the accuracy or integrity of any part of the work are appropriately investigated and resolved.

Dr Pekkanen has made substantial contributions to the conception and design of the work, and interpretation of data for the work, and drafting the manuscript. He has provided a final approval of the version to be published and has given his approval to be accountable for all aspects of the work in ensuring that questions related to the accuracy or integrity of any part of the work are appropriately investigated and resolved.

## REFERENCES

- 1 Wandell P, Carlsson AC, Wettermark B, et al. Most common diseases diagnosed in primary care in Stockholm, Sweden, in 2011. *Fam Pract* 2013;30:506-13.
- 2 Centers for disease control and prevention, USA. National Ambulatory Medical Care Survey: 2015 Summary Tables. [https://www.cdc.gov/nchs/ahcd/web\\_tables.htm#2015](https://www.cdc.gov/nchs/ahcd/web_tables.htm#2015). Access date January 2019.
- 3 Hoa NB, Tiemersma EW, Sy DN, et al. Health-seeking behaviour among adults with prolonged cough in Vietnam. *Trop Med Int Health* 2011;16:1260-7.
- 4 Satyanarayana S, Nair SA, Chadha SS, et al. Health-care seeking among people with cough of 2 weeks or more in India. Is passive TB case finding sufficient? *Public Health Action* 2012;2:157-61.
- 5 Senkoro M, Hinderaker SG, Mfinanga SG, et al. Health care-seeking behaviour among people with cough in Tanzania: findings from a tuberculosis prevalence survey. *Int J Tuberc Lung Dis* 2015;19:640-6.
- 6 Lätti AM, Pekkanen J, Koskela HO. Defining the risk factors for acute, subacute and chronic cough: a cross-sectional study in a Finnish adult employee population. *BMJ Open* 2018;8:e022950.
- 7 Koskela HO, Lätti AM, Pekkanen J. The impacts of cough: a cross-sectional study in a Finnish adult employee population. *ERJ Open Res* 2018;4:00113-2018
- 8 Sa-Sousa A, Jacinto T, Azevedo LF, et al. Operational definitions of asthma in recent epidemiological studies are inconsistent. *Clin Transl Allergy* 2014;4:24.
- 9 Fokkens WJ, Lund VJ, Mullol J, et al. European Position Paper on Rhinosinusitis and Nasal Polyps 2012. *Rhinol Suppl* 2012;50:1-298.
- 10 El-Serag HB, Sweet S, Winchester CC, et al. Update on the epidemiology of gastro-oesophageal reflux disease: a systematic review. *Gut* 2014;63:871-80.
- 11 Kroenke K, Spitzer RL, Williams JB. The Patient Health Questionnaire-2: validity of a two-item depression screener. *Med Care* 2003;41:1284-92.
- 12 Birring SS, Prudon B, Carr AJ, et al. Development of a symptom specific health status measure for patients with chronic cough: Leicester Cough Questionnaire (LCQ). *Thorax* 2003;58:339-43.
- 13 National Institute for Health and Welfare. Health Behaviour and Health among the Finnish Adult Population. <https://thl.fi/en/tutkimus-ja-kehittaminen/tutkimukset-ja-hankkeet/aikuisten-terveys-hyvinvointi-ja-palvelututkimus-ath/aiemmat-tutkimukset/suomalaisen-aikuisvaeston-terveyskayttaytyminen-ja-terveys-avtk>. Access date January 2019.
- 14 National Institute for Health and Welfare. The National FINRISK Study. <https://thl.fi/en/web/thlfi-en/research-and-expertwork/population-studies/the-national-finrisk-study>. Access date January 2019.
- 15 Morice AH, McGarvey L, Pavord I, et al. Recommendations for the management of cough in adults. *Thorax* 2006;61 Suppl 1:i24.

1  
2  
3 16 Irwin RS, French CL, Chang AB, et al. Classification of Cough as a Symptom in Adults and  
4 Management Algorithms: CHEST Guideline and Expert Panel Report. *Chest* 2018;153:196-209.

5  
6 17 Rais S, Nazerian A, Ardal S, et al. High-cost users of Ontario's healthcare services. *Healthc Policy*  
7 2013;9:44-51.

8  
9 18 Hutchinson AF, Graco M, Rasekaba TM, et al. Relationship between health-related quality of life,  
10 comorbidities and acute health care utilisation, in adults with chronic conditions. *Health Qual Life*  
11 *Outcomes* 2015;13:69.

12  
13 19 Lee NS, Whitman N, Vakharia N, et al. High-Cost Patients: Hot-Spotters Don't Explain the Half of  
14 It. *J Gen Intern Med* 2017;32:28-34.

15  
16 20 Hensel JM, Taylor VH, Fung K, et al. Unique Characteristics of High-Cost Users of Medical Care  
17 With Comorbid Mental Illness or Addiction in a Population-Based Cohort. *Psychosomatics*  
18 2018;59:135-43.

19  
20 21 Babitsch B, Gohl D, von Lengerke T. Re-reconsultation of Andersen's Behavioral Model of Health  
21 Services Use: a systematic review of studies from 1998-2011. *Psychosoc Med* 2012;9:Doc11.

22  
23 22 Everett CF, Kastelik JA, Thompson RH, et al. Chronic persistent cough in the community: a  
24 questionnaire survey. *Cough* 2007;3:5.

25  
26 23 Abdulqawi R, Dockry R, Holt K, et al. P2X3 receptor antagonist (AF-219) in refractory chronic  
27 cough: a randomised, double-blind, placebo-controlled phase 2 study. *Lancet* 2015;385:1198-205.

## FIGURE LEGENDS

Figure 1. Percentage of participants with repetitive ( $\geq 3$  during 12 months) doctor's consultations due to cough in each Leicester Cough Questionnaire (LCQ) total score tertile. N = 975, participants with current cough. Low LCQ total score indicates poor cough-related quality of life.

For peer review only

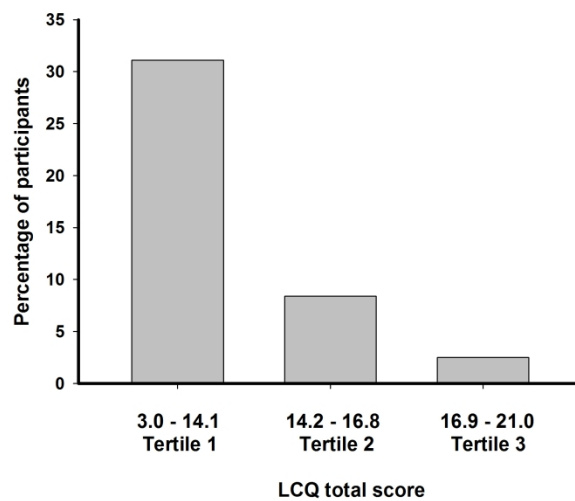

Figure 1. Percentage of participants with repetitive ( $\geq 3$  during 12 months) doctor's consultations due to cough in each Leicester Cough Questionnaire (LCQ) total score tertile. N = 975, participants with current cough. Low LCQ total score indicates poor cough-related quality of life.

209x296mm (300 x 300 DPI)

## STROBE Statement—checklist of items that should be included in reports of observational studies

|                           | Item No. | Recommendation                                                                                      | Page No. | Relevant text from manuscript                                                                                                                                                                                                                                                                     |
|---------------------------|----------|-----------------------------------------------------------------------------------------------------|----------|---------------------------------------------------------------------------------------------------------------------------------------------------------------------------------------------------------------------------------------------------------------------------------------------------|
| <b>Title and abstract</b> | 1        | (a) Indicate the study's design with a commonly used term in the title or the abstract              | 1, 2     | Title and abstract, design: A cross-sectional, email survey                                                                                                                                                                                                                                       |
|                           |          | (b) Provide in the abstract an informative and balanced summary of what was done and what was found | 2        | See the abstract                                                                                                                                                                                                                                                                                  |
| <b>Introduction</b>       |          |                                                                                                     |          |                                                                                                                                                                                                                                                                                                   |
| Background/rationale      | 2        | Explain the scientific background and rationale for the investigation being reported                | 4        | Thus, a more reasonable goal might be to decrease the number of repetitive consultations due to cough by the same individual. If we wish to plan interventions to achieve this goal, then it is important that the factors that are associated with repetitive consultations should be clarified. |
| Objectives                | 3        | State specific objectives, including any prespecified hypotheses                                    | 4        | If we wish to plan interventions to achieve this goal, then it is important that the factors that are associated with repetitive consultations should be clarified.                                                                                                                               |
| <b>Methods</b>            |          |                                                                                                     |          |                                                                                                                                                                                                                                                                                                   |
| Study design              | 4        | Present key elements of study design early in the paper                                             | 4        | This was a cross-sectional e-mail study conducted in all public service employees of two towns in central Finland                                                                                                                                                                                 |



|                              |    |                                                                                                                                                                                            |      |                                                                                                                                                                                                                            |
|------------------------------|----|--------------------------------------------------------------------------------------------------------------------------------------------------------------------------------------------|------|----------------------------------------------------------------------------------------------------------------------------------------------------------------------------------------------------------------------------|
| Setting                      | 5  | Describe the setting, locations, and relevant dates, including periods of recruitment, exposure, follow-up, and data collection                                                            | 4    | An invitation to the study and the questionnaire were sent to the employees' e-mail addresses in March - April 2017. Responses were collected via an electronic questionnaire                                              |
| Participants                 | 6  | (a) <i>Cohort study</i> —Give the eligibility criteria, and the sources and methods of selection of participants. Describe methods of follow-up                                            | 4    | This was a cross-sectional e-mail study among all public service employees of two towns in central Finland.                                                                                                                |
|                              |    | <i>Case-control study</i> —Give the eligibility criteria, and the sources and methods of case ascertainment and control selection. Give the rationale for the choice of cases and controls |      |                                                                                                                                                                                                                            |
|                              |    | <i>Cross-sectional study</i> —Give the eligibility criteria, and the sources and methods of selection of participants                                                                      |      |                                                                                                                                                                                                                            |
|                              |    | (b) <i>Cohort study</i> —For matched studies, give matching criteria and number of exposed and unexposed                                                                                   | NA   |                                                                                                                                                                                                                            |
|                              |    | <i>Case-control study</i> —For matched studies, give matching criteria and the number of controls per case                                                                                 |      |                                                                                                                                                                                                                            |
| Variables                    | 7  | Clearly define all outcomes, exposures, predictors, potential confounders, and effect modifiers. Give diagnostic criteria, if applicable                                                   | 5, 6 | The main outcome was repetitive doctor's consultations due to cough. In the present study, 'repetitive consultations' was arbitrarily defined as at least three doctor's consultations due to cough in the past 12 months. |
| Data sources/<br>measurement | 8* | For each variable of interest, give sources of data and details of methods of assessment (measurement). Describe comparability of assessment methods if there is more than one group       | 5    | See the paragraph "Questionnaire".                                                                                                                                                                                         |
| Bias                         | 9  | Describe any efforts to address potential sources of bias                                                                                                                                  | 12   | The participation rate to the survey was relatively low. It is possible that subjects with current cough were more interested to participate than                                                                          |

---

1  
2  
3  
4  
5  
6

---

|   |            |    |                                           |      |                                                                                                                                                                                |
|---|------------|----|-------------------------------------------|------|--------------------------------------------------------------------------------------------------------------------------------------------------------------------------------|
| 7 | Study size | 10 | Explain how the study size was arrived at | 4, 7 | those without. However, the responders and non-responders did not differ with respect to age and sex distribution.                                                             |
| 8 |            |    |                                           |      | This was a cross-sectional e-mail study among all public service employees of two towns in central Finland (altogether 13 980 employees, mean 46,6 years with 79.2 % females). |
| 9 |            |    |                                           |      | The response rate was 26.4 % (3695 subjects, mean age 47.8 (47.5 – 48.2) years, 82.6 % females, 31.4 % ever-smokers, table 1).                                                 |

---

21 Continued on next page

For peer review only

1  
2  
3  
4  
5  
6  
7  
8  
9  
10  
11  
12  
13  
14  
15  
16  
17  
18  
19  
20  
21  
22  
23  
24  
25  
26  
27  
28  
29  
30  
31  
32  
33  
34  
35  
36  
37  
38  
39  
40  
41  
42  
43  
44  
45  
46

|                        |     |                                                                                                                                                                                                                                                                                   |      |                                                                                                                                                                                                                                                                                                                                      |
|------------------------|-----|-----------------------------------------------------------------------------------------------------------------------------------------------------------------------------------------------------------------------------------------------------------------------------------|------|--------------------------------------------------------------------------------------------------------------------------------------------------------------------------------------------------------------------------------------------------------------------------------------------------------------------------------------|
| Quantitative variables | 11  | Explain how quantitative variables were handled in the analyses. If applicable, describe which groupings were chosen and why                                                                                                                                                      | 6    | See the chapter ‘statistical analysis’                                                                                                                                                                                                                                                                                               |
| Statistical methods    | 12  | (a) Describe all statistical methods, including those used to control for confounding                                                                                                                                                                                             | 6    | See the chapter ‘statistical analysis’                                                                                                                                                                                                                                                                                               |
|                        |     | (b) Describe any methods used to examine subgroups and interactions                                                                                                                                                                                                               |      |                                                                                                                                                                                                                                                                                                                                      |
|                        |     | (c) Explain how missing data were addressed                                                                                                                                                                                                                                       | 7    | The proportion of missing values was less than 1 % in all other questions except family income (2.5%) and acetylsalicylic acid intolerance (1.4 %).                                                                                                                                                                                  |
|                        |     | (d) Cohort study—If applicable, explain how loss to follow-up was addressed<br>Case-control study—If applicable, explain how matching of cases and controls was addressed<br>Cross-sectional study—If applicable, describe analytical methods taking account of sampling strategy | 6    | See the chapter ‘statistical analysis’                                                                                                                                                                                                                                                                                               |
|                        |     | (e) Describe any sensitivity analyses                                                                                                                                                                                                                                             | 5, 7 | The main outcome was repetitive doctor’s consultations due to cough. During the last 12 months, 22.5 % of the responders had consulted a doctor due to cough at least once, 11.2 % at least twice, 5.5 % at least three times, 2.7 % at least four times, and 1.4 % at least five times. See also the chapter ‘statistical analysis’ |
| <b>Results</b>         |     |                                                                                                                                                                                                                                                                                   |      |                                                                                                                                                                                                                                                                                                                                      |
| Participants           | 13* | (a) Report numbers of individuals at each stage of study—eg numbers potentially eligible, examined for eligibility, confirmed eligible, included in the study, completing follow-up, and analysed                                                                                 | 4, 7 | This was a cross-sectional e-mail study among all public service employees of two towns in central Finland (altogether 13 980 employees, mean 46,6 years with 79.2 % females).                                                                                                                                                       |

|                  |     |                                                                                                                                                                                                              |                                |                                                                                                                                                                                                                                                                                                          |
|------------------|-----|--------------------------------------------------------------------------------------------------------------------------------------------------------------------------------------------------------------|--------------------------------|----------------------------------------------------------------------------------------------------------------------------------------------------------------------------------------------------------------------------------------------------------------------------------------------------------|
|                  |     |                                                                                                                                                                                                              |                                | The response rate was 26.4 % (3695 subjects, mean age 47.8 (47.5 – 48.2) years, 82.6 % females, 31.4 % ever-smokers, table 1).                                                                                                                                                                           |
|                  |     | (b) Give reasons for non-participation at each stage                                                                                                                                                         | NA                             |                                                                                                                                                                                                                                                                                                          |
|                  |     | (c) Consider use of a flow diagram                                                                                                                                                                           | NA                             |                                                                                                                                                                                                                                                                                                          |
| Descriptive data | 14* | (a) Give characteristics of study participants (eg demographic, clinical, social) and information on exposures and potential confounders                                                                     | Table 1                        | Table 1                                                                                                                                                                                                                                                                                                  |
|                  |     | (b) Indicate number of participants with missing data for each variable of interest                                                                                                                          | 7                              | The proportion of missing values was less than 1 % in all other questions except family income (2.5%) and acetylsalicylic acid intolerance (1.4 %). (2.5%) and acetylsalicylic acid intolerance (1.4 %).                                                                                                 |
|                  |     | (c) <i>Cohort study</i> —Summarise follow-up time (eg, average and total amount)                                                                                                                             | NA                             |                                                                                                                                                                                                                                                                                                          |
| Outcome data     | 15* | <i>Cohort study</i> —Report numbers of outcome events or summary measures over time                                                                                                                          | NA                             |                                                                                                                                                                                                                                                                                                          |
|                  |     | <i>Case-control study</i> —Report numbers in each exposure category, or summary measures of exposure                                                                                                         | NA                             |                                                                                                                                                                                                                                                                                                          |
|                  |     | <i>Cross-sectional study</i> —Report numbers of outcome events or summary measures                                                                                                                           | 7                              | Among the responders, there were 205 subjects (5.5 % of the responders) with repetitive doctor's visits due to cough.                                                                                                                                                                                    |
| Main results     | 16  | (a) Give unadjusted estimates and, if applicable, confounder-adjusted estimates and their precision (eg, 95% confidence interval). Make clear which confounders were adjusted for and why they were included | Tables 1, 2, 3, 4, text page 6 | The variables showing at least a suggestive ( $p < 0.1$ ) association with repetitive consultations in the bivariate analyses were included in the multivariate analyses utilising binary logistic regression analysis with backward directed stepwise process to eliminate non-significant confounders. |

1  
2  
3  
4  
5  
6  
7  
8  
9  
10  
11  
12  
13  
14  
15  
16  
17  
18  
19  
20  
21  
22  
23  
24  
25  
26  
27  
28  
29  
30  
31  
32  
33  
34  
35  
36  
37  
38  
39  
40  
41  
42  
43  
44  
45  
46

---

(b) Report category boundaries when continuous variables were categorized

6

The LCQ total scores (ts) were divided into tertiles. First tertile: 3.0 - 14.1, second tertile: 14.2 to 16.8, and third tertile: 16.9 to 21.0. The cough bout frequency was also divided into tertiles: First tertile: on 2 – 3 days per week or less often, second tertile: on 4 – 6 days per week to once daily, and third tertile: several times daily. The cough episode duration was categorized according to the current guidelines to < 3 weeks (acute cough), 3 – 8 weeks (subacute cough), and > 8 weeks (chronic cough).

---

(c) If relevant, consider translating estimates of relative risk into absolute risk for a meaningful time period

NA

---

Continued on next page

For peer review only

|                          |    |                                                                                                                                                                            |    |                                                                                                                                                                                                                                                                                                                                                                                                                           |
|--------------------------|----|----------------------------------------------------------------------------------------------------------------------------------------------------------------------------|----|---------------------------------------------------------------------------------------------------------------------------------------------------------------------------------------------------------------------------------------------------------------------------------------------------------------------------------------------------------------------------------------------------------------------------|
| Other analyses           | 17 | Report other analyses done—eg analyses of subgroups and interactions, and sensitivity analyses                                                                             | 6  | There were 975 subjects with current cough                                                                                                                                                                                                                                                                                                                                                                                |
| <b>Discussion</b>        |    |                                                                                                                                                                            |    |                                                                                                                                                                                                                                                                                                                                                                                                                           |
| Key results              | 18 | Summarise key results with reference to study objectives                                                                                                                   | 9  | In the whole population, the list of factors behind repetitive visits resembled that of the common causes of chronic cough, predominated by current asthma and chronic rhinosinusitis. The analysis in the 975 subjects with current cough included more detailed information. Among them, the dominant factor behind repetitive doctor's visits was the severity of the impairment in the cough-related quality of life. |
| Limitations              | 19 | Discuss limitations of the study, taking into account sources of potential bias or imprecision. Discuss both direction and magnitude of any potential bias                 | 11 | There are several shortcomings in the present study...                                                                                                                                                                                                                                                                                                                                                                    |
| Interpretation           | 20 | Give a cautious overall interpretation of results considering objectives, limitations, multiplicity of analyses, results from similar studies, and other relevant evidence | 11 |                                                                                                                                                                                                                                                                                                                                                                                                                           |
| Generalisability         | 21 | Discuss the generalisability (external validity) of the study results                                                                                                      | 9  | The present population may not represent well the general population since elderly and unemployed subjects were missing.                                                                                                                                                                                                                                                                                                  |
| <b>Other information</b> |    |                                                                                                                                                                            |    |                                                                                                                                                                                                                                                                                                                                                                                                                           |
| Funding                  | 22 | Give the source of funding and the role of the funders for the present study and, if applicable, for the original study on which the present article is based              | 3  | The study was funded by grants from Kuopion Hengityssäätö and Hengityssairauksien Tutkimussäätiö foundations.                                                                                                                                                                                                                                                                                                             |

\*Give information separately for cases and controls in case-control studies and, if applicable, for exposed and unexposed groups in cohort and cross-sectional studies.

1  
2  
3  
4  
5  
6  
7  
8  
9  
10  
11  
12  
13  
14  
15  
16  
17  
18  
19  
20  
21  
22  
23  
24  
25  
26  
27  
28  
29  
30  
31  
32  
33  
34  
35  
36  
37  
38  
39  
40  
41  
42  
43  
44  
45  
46

**Note:** An Explanation and Elaboration article discusses each checklist item and gives methodological background and published examples of transparent reporting. The STROBE checklist is best used in conjunction with this article (freely available on the Web sites of PLoS Medicine at <http://www.plosmedicine.org/>, Annals of Internal Medicine at <http://www.annals.org/>, and Epidemiology at <http://www.epidem.com/>). Information on the STROBE Initiative is available at [www.strobe-statement.org](http://www.strobe-statement.org).

For peer review only
