# Supplementary material for: Risk factors for repetitive doctor’s consultations due to cough: a cross-sectional study in a Finnish employed population
Source: PubMed Central journal article supplement — BMJ Open. 2019 Jun 11;9(6):e030945. doi: 10.1136/bmjopen-2019-030945 (PMC6576114; doi:10.1136/bmjopen-2019-030945), 2019-06-11
Supplement: bmjopen-2019-030945.reviewer_comments.pdf [file bmjopen-2019-030945.reviewer_comments.pdf]

## PEER REVIEW HISTORY

BMJ Open publishes all reviews undertaken for accepted manuscripts. Reviewers are asked to complete a checklist review form (<http://bmjopen.bmj.com/site/about/resources/checklist.pdf>) and are provided with free text boxes to elaborate on their assessment. These free text comments are reproduced below.

### ARTICLE DETAILS

|                            |                                                                                                                               |
|----------------------------|-------------------------------------------------------------------------------------------------------------------------------|
| <b>TITLE (PROVISIONAL)</b> | The risk factors for repetitive doctor's consultations due to cough: A cross-sectional study in a Finnish employed population |
| <b>AUTHORS</b>             | Koskela, Heikki; Lätti, Anne; Pekkanen, Juha                                                                                  |

### VERSION 1 - REVIEW

|                        |                                                                                                |
|------------------------|------------------------------------------------------------------------------------------------|
| <b>REVIEWER</b>        | Woo-Jung Song<br>Asan Medical Center, University of Ulsan College of Medicine,<br>Seoul, Korea |
| <b>REVIEW RETURNED</b> | 14-Apr-2019                                                                                    |

|                         |                                                                                                                                                                                                                                                                                                                                                                                                                                                                                                                                                                                                                                                   |
|-------------------------|---------------------------------------------------------------------------------------------------------------------------------------------------------------------------------------------------------------------------------------------------------------------------------------------------------------------------------------------------------------------------------------------------------------------------------------------------------------------------------------------------------------------------------------------------------------------------------------------------------------------------------------------------|
| <b>GENERAL COMMENTS</b> | <p>The revision has rendered the manuscript more appropriate for publication. Now I have just a few suggestions.</p> <p>Minor comments</p> <ol style="list-style-type: none"><li>1. Methods: It is suggested to state the main questions (on cough presence and the number of doctor's consultations due to cough) within the main text.</li><li>2. Page 10; It was very notable that psychological domains in LCQ were more closely associated with repetitive doctor's consultations than others. I suggest to present the data in detail as a table (or any proper format), and also to consider adding it in Abstract's conclusion.</li></ol> |
|-------------------------|---------------------------------------------------------------------------------------------------------------------------------------------------------------------------------------------------------------------------------------------------------------------------------------------------------------------------------------------------------------------------------------------------------------------------------------------------------------------------------------------------------------------------------------------------------------------------------------------------------------------------------------------------|

|                        |                                            |
|------------------------|--------------------------------------------|
| <b>REVIEWER</b>        | Surinder Birring<br>Kings College Hospital |
| <b>REVIEW RETURNED</b> | 30-Apr-2019                                |

|                         |                                                            |
|-------------------------|------------------------------------------------------------|
| <b>GENERAL COMMENTS</b> | My comments have been addressed in the revised manuscript. |
|-------------------------|------------------------------------------------------------|

## VERSION 1 – AUTHOR RESPONSE

Reviewer(s) Reports:

Reviewer: 1

Reviewer Name: Woo-Jung Song

Institution and Country: Asan Medical Center, University of Ulsan College of Medicine, Seoul, Korea  
Please state any competing interests or state 'None declared': None declared

Please leave your comments for the authors below The revision has rendered the manuscript more appropriate for publication. Now I have just a few suggestions.

Minor comments

1. Methods: It is suggested to state the main questions (on cough presence and the number of doctor's consultations due to cough) within the main text.

Authors' reply: We have now tried to express the main question more clearly at the end of the introduction.

2. Page 10; It was very notable that psychological domains in LCQ were more closely associated with repetitive doctor's consultations than others. I suggest to present the data in detail as a table (or any proper format), and also to consider adding it in Abstract's conclusion.

Author's reply: This data is now presented in the new table 5. However, we feel that this is not the main finding of the present study and thus would not like to mention these findings in Abstract.

Reviewer: 2

Reviewer Name: Surinder Biring

Institution and Country: Kings College Hospital Please state any competing interests or state 'None declared': none

Please leave your comments for the authors below My comments have been addressed in the revised manuscript.
